# Supplementary material for: Transcriptomic Analysis Reveals the Regulatory Mechanism of Color Diversity in Rhododendron pulchrum Sweet (Ericaceae)
Source: Plants (Basel). 2023 Jul 15;12(14):2656. doi: 10.3390/plants12142656 (PMC10384940; doi:10.3390/plants12142656)
Supplement: Supplementary file 1 [file plants-12-02656-s001.zip]

Archive with 8 entries (8 files):
- Figure S2.  Enrichment  of top 10 GO pathways.pdf
- plants-2369245 Supplementary Figures S1, S3, S4.pdf
- Table S1.xlsx
- Table S2.xlsx
- Table S3.xlsx
- Table S4.xlsx
- Table S5.xlsx
- Table S6.xlsx
