# Supplementary material for: Transcriptomic Analysis Reveals the Regulatory Mechanism of Color Diversity in Rhododendron pulchrum Sweet (Ericaceae)
Source: Plants (Basel). 2023 Jul 15;12(14):2656. doi: 10.3390/plants12142656 (PMC10384940; doi:10.3390/plants12142656)
Supplement: Supplementary file 1 [file plants-12-02656-s001.zip › Figure S2. Enrichment of top 10 GO pathways.pdf]

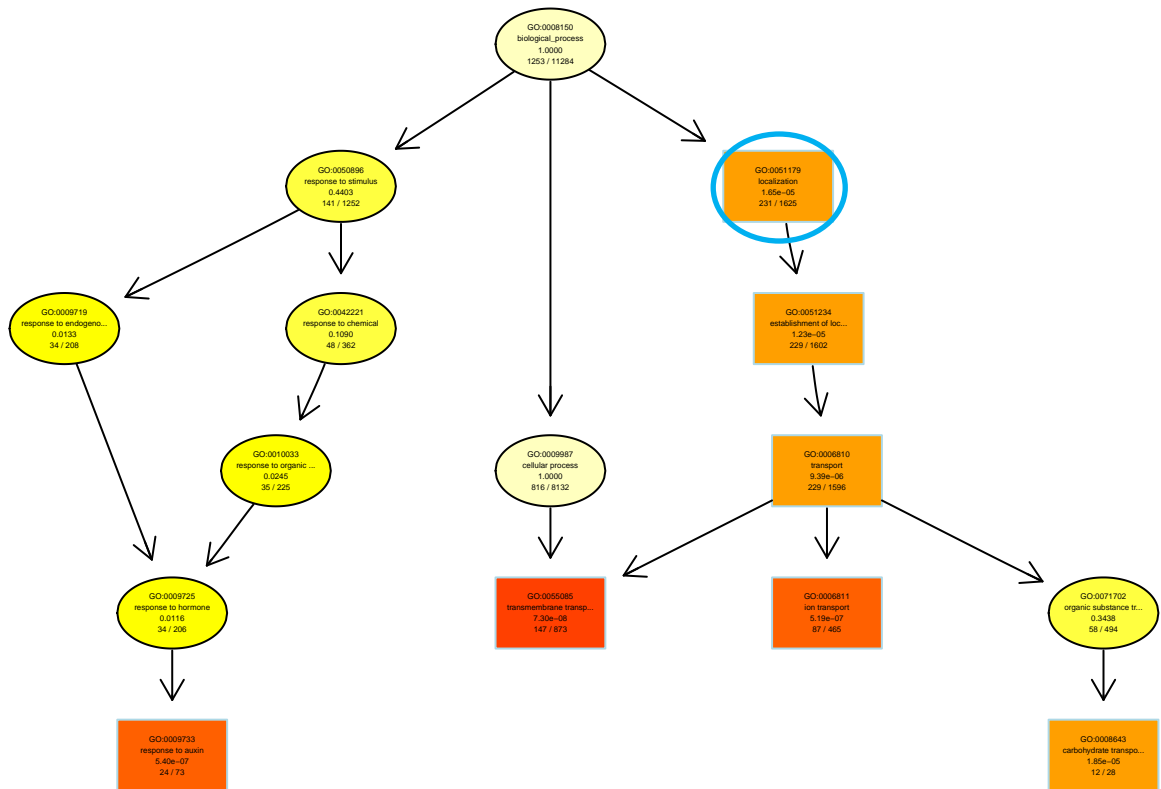

( a ) Top10\_GO\_BP\_D\_vs\_A

Figure S2. Enrichment of top 10 GO pathways in (a) BP categories in the D vs. A comparison; (b) BP categories in the C vs. A comparison; (c) BP categories in the B vs. A comparison; (d) CC categories in the D vs. A comparison; (e) CC categories in the C vs. A comparison; (f) CC categories in the B vs. A comparison; (g) MF categories in the D vs. A comparison; (h) MF categories in the C vs. A comparison; (j) MF categories in the B vs. A comparison.

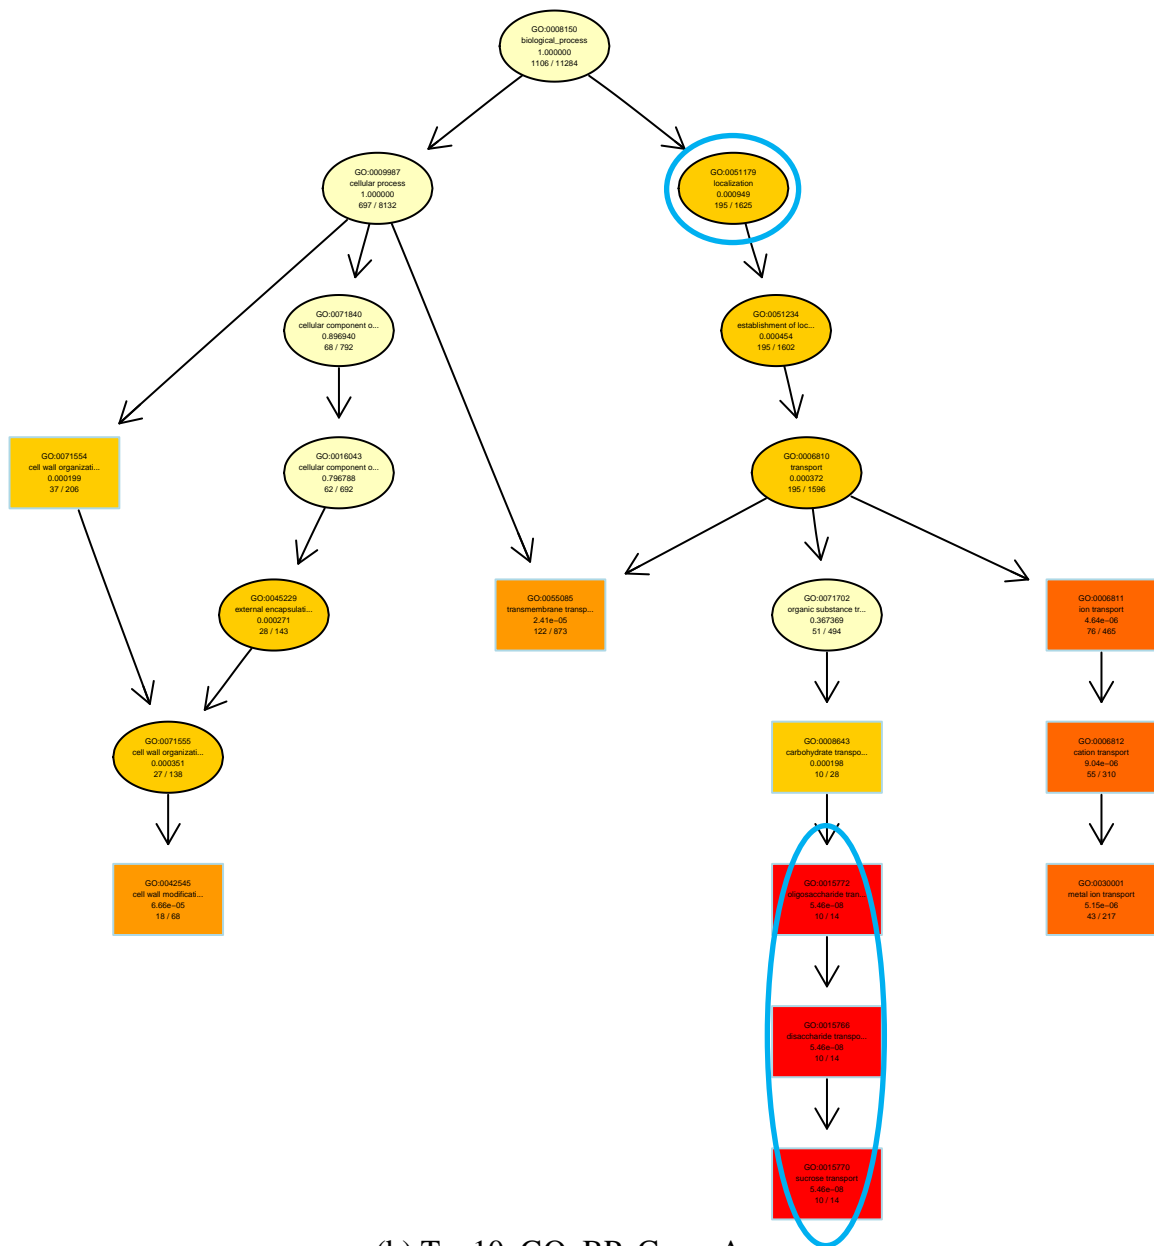

(b) Top10\_GO\_BP\_C\_vs\_A



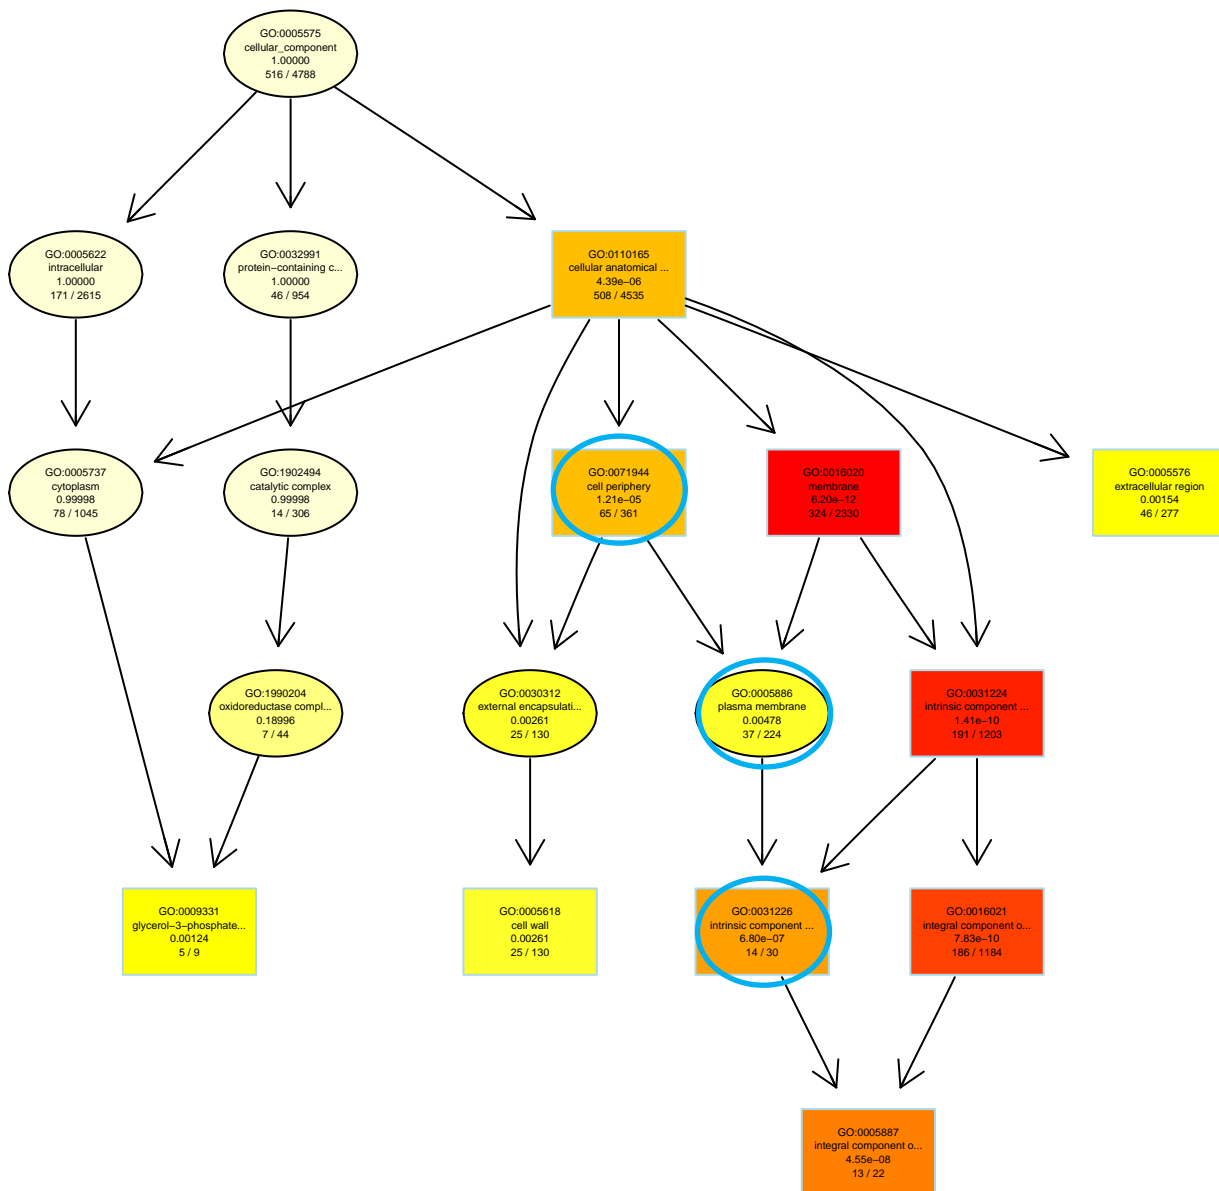

(d) Top10\_GO\_CC\_D\_vs\_A

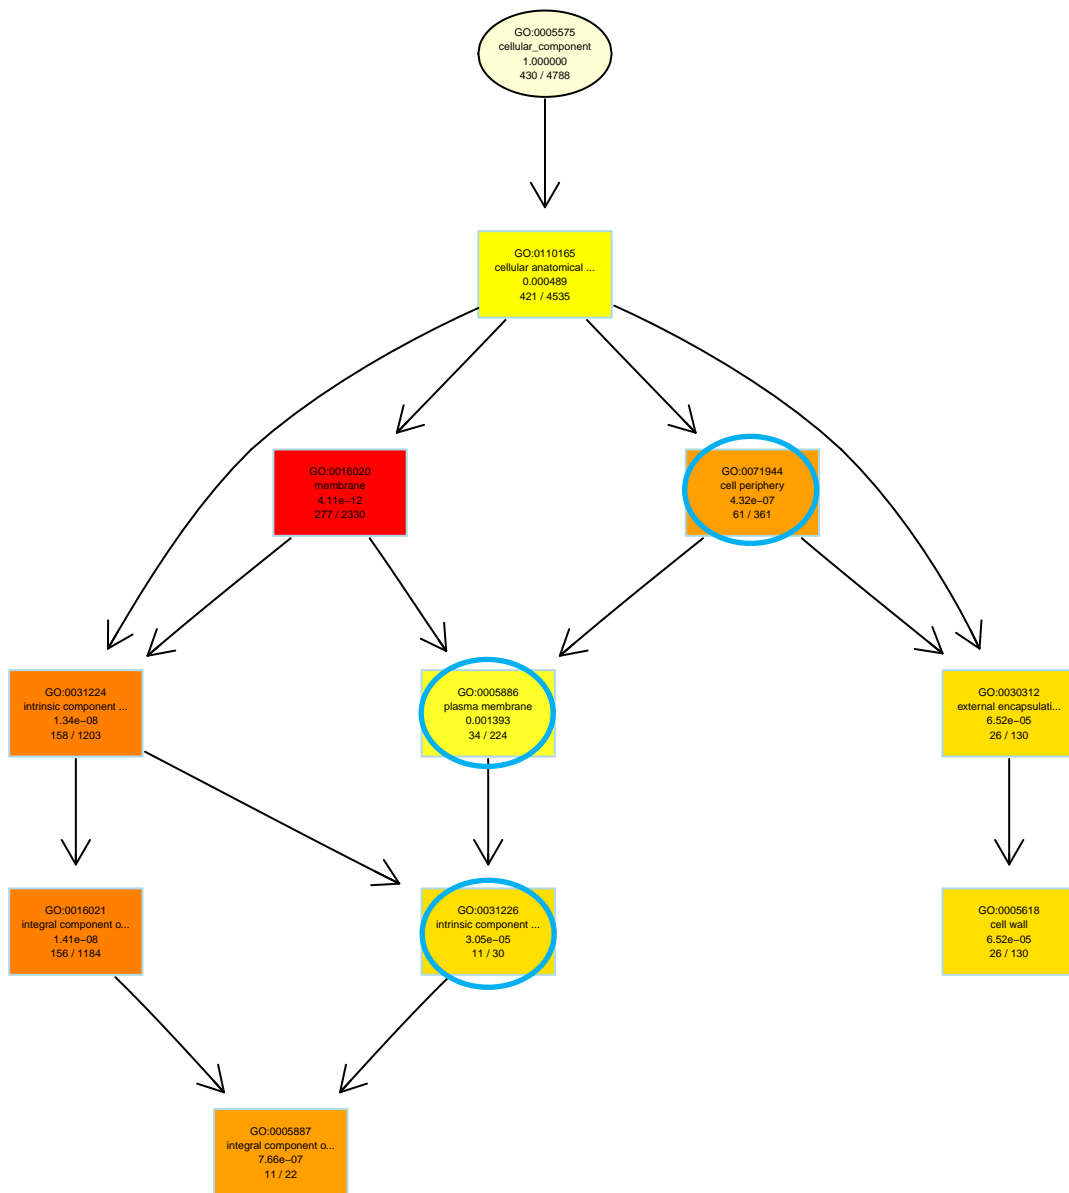

(e) Top10\_GO\_CC\_C\_vs\_A

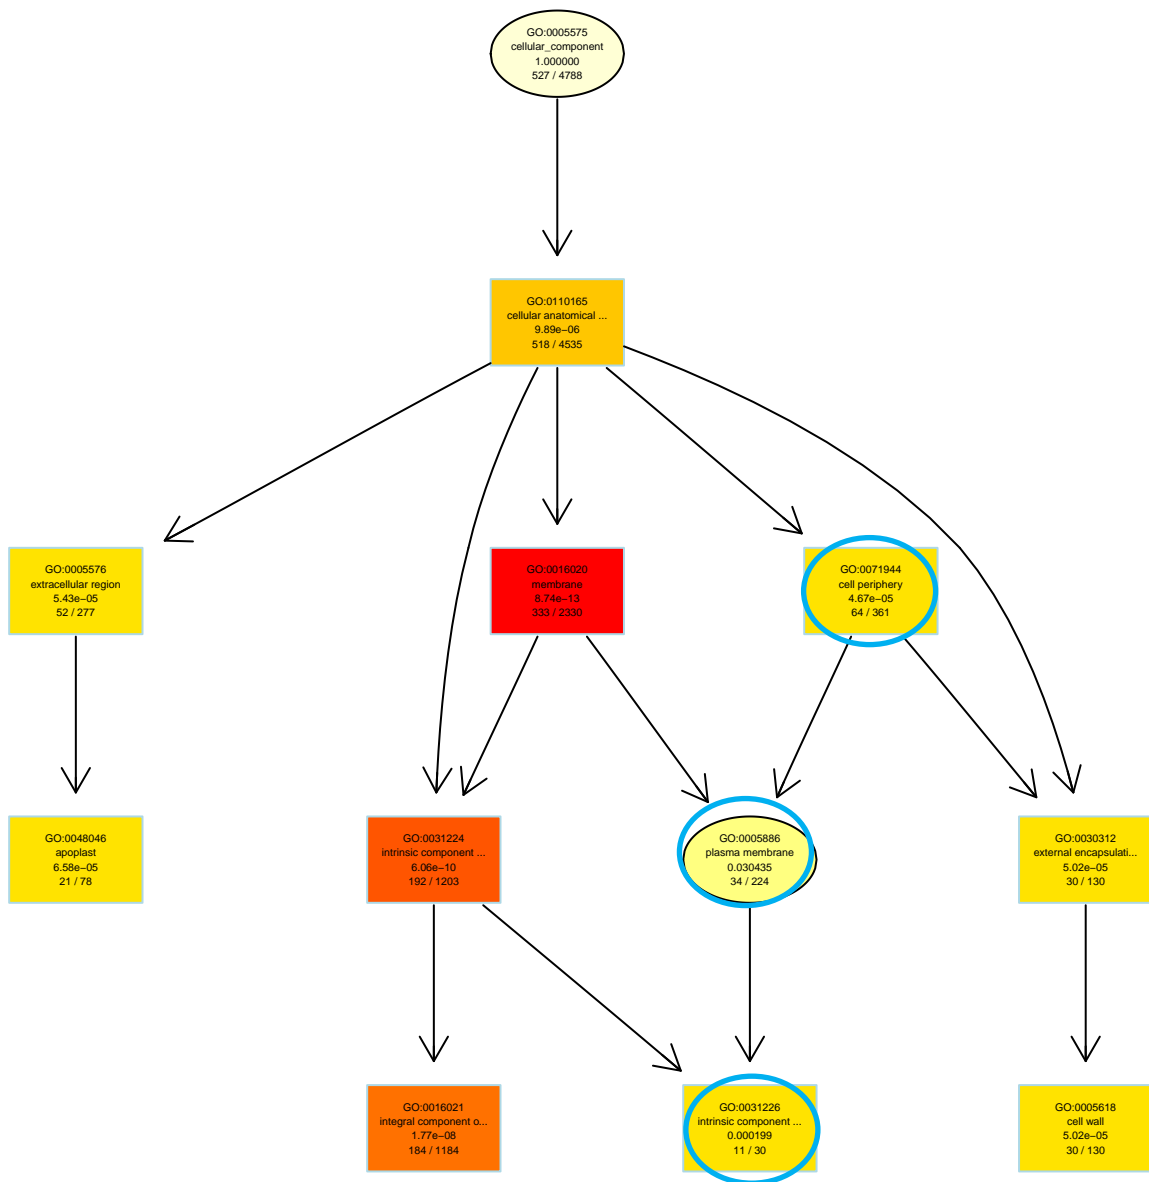

(f) Top10\_GO\_CC\_B\_vs\_A

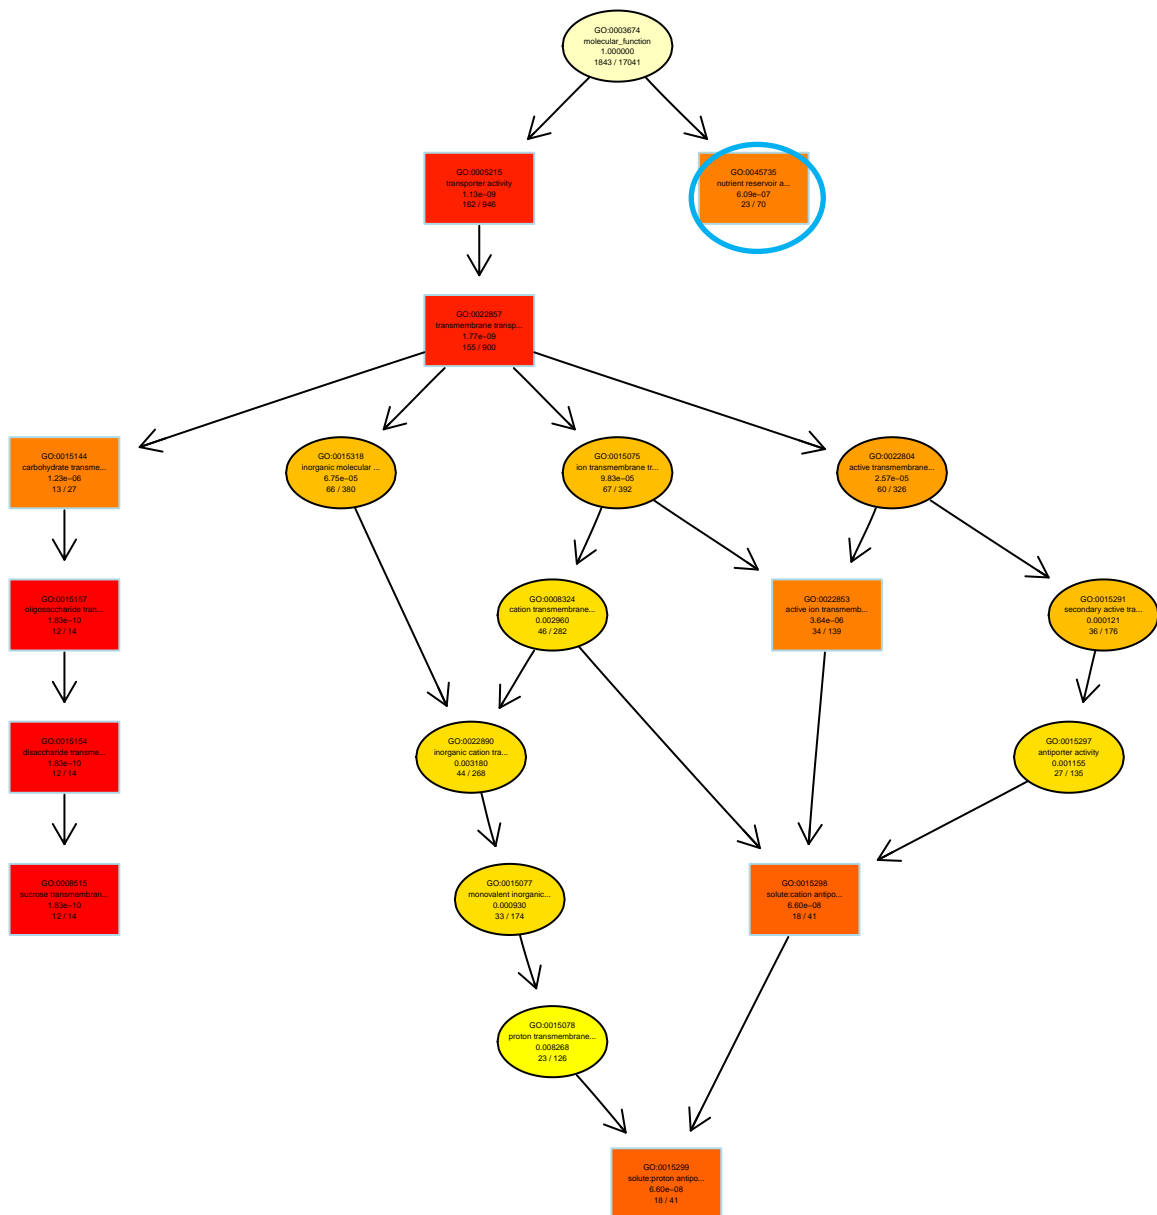

(g) Top10\_GO\_MF\_D\_vs\_A

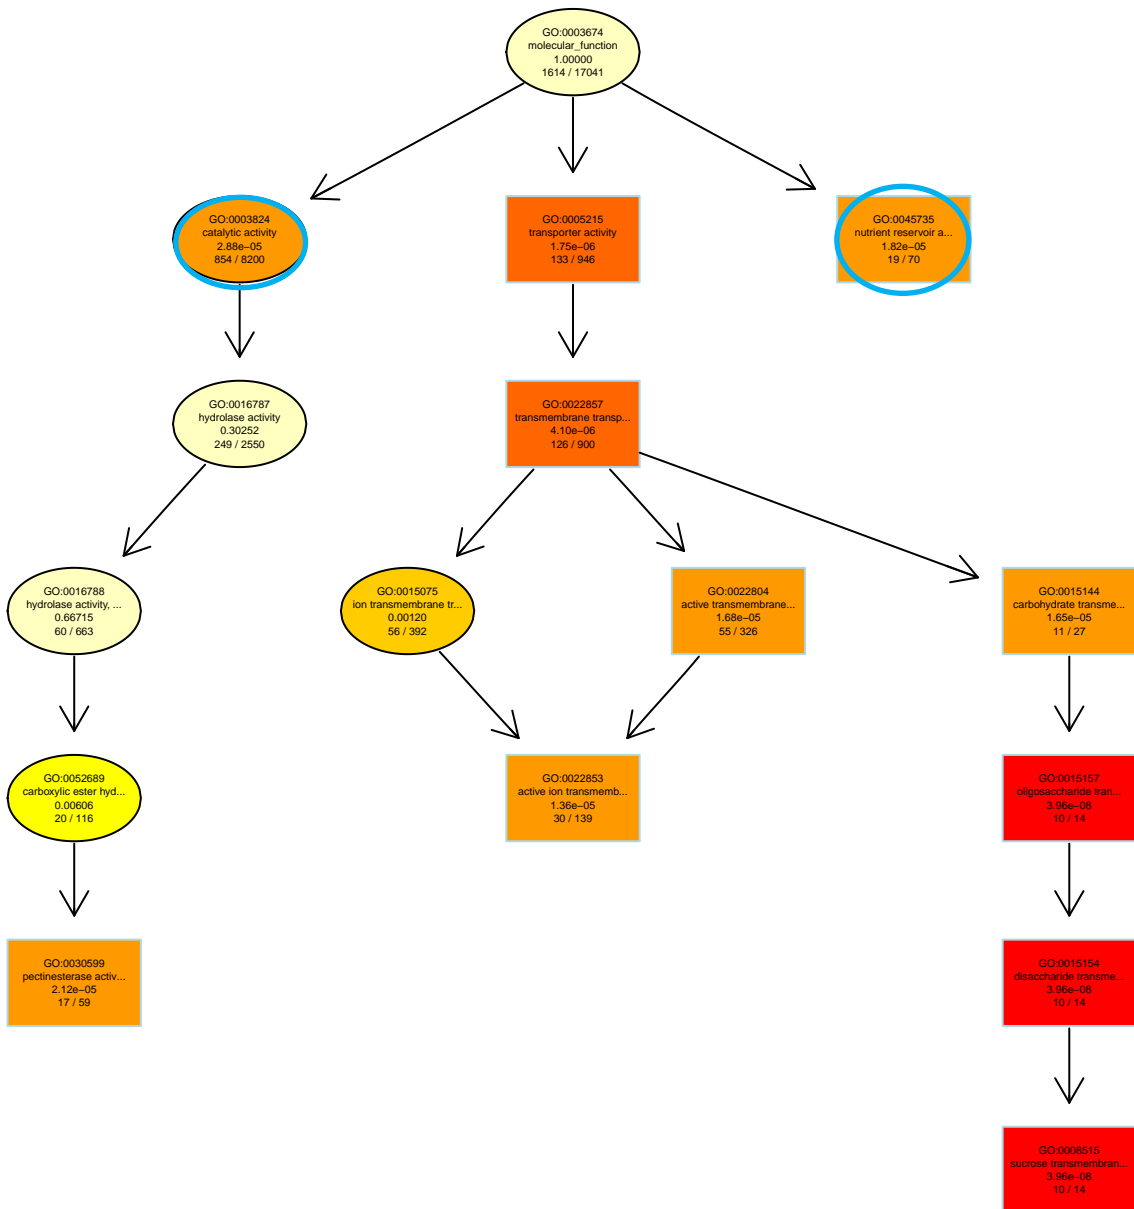

(h)Top10\_GO\_MF\_C\_vs\_A

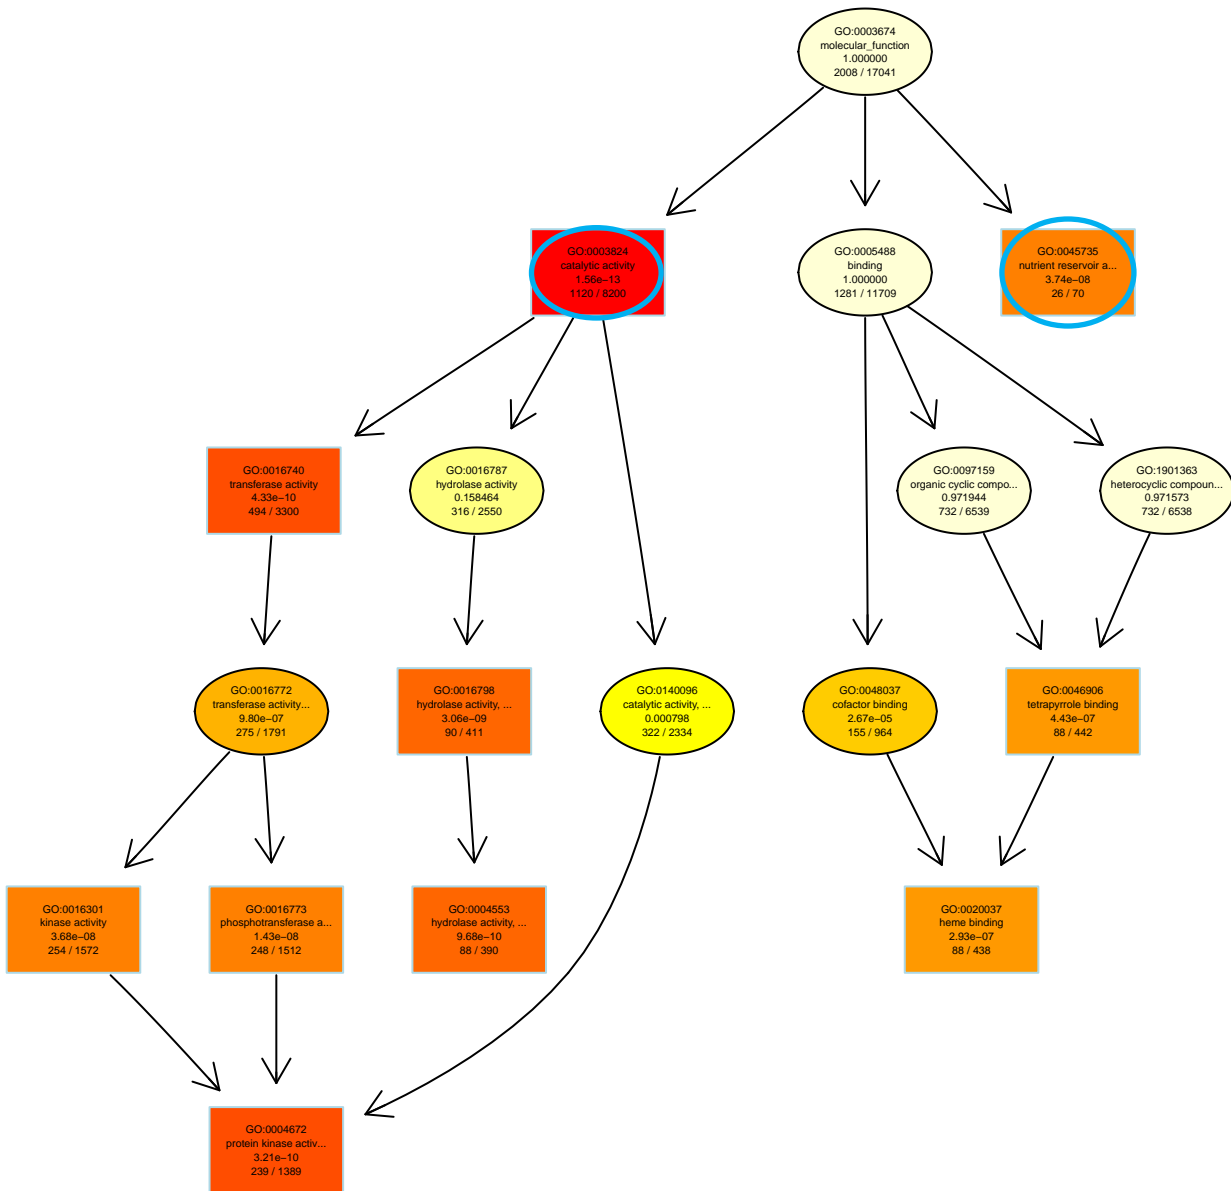

(i) Top10\_GO\_MF\_B\_vs\_A
