# Supplementary material for: Transcriptomic Analysis Reveals the Regulatory Mechanism of Color Diversity in Rhododendron pulchrum Sweet (Ericaceae)
Source: Plants (Basel). 2023 Jul 15;12(14):2656. doi: 10.3390/plants12142656 (PMC10384940; doi:10.3390/plants12142656)
Supplement: Supplementary file 1 [file plants-12-02656-s001.zip › plants-2369245 Supplementary Figures S1, S3, S4.pdf]

Supplementary Materials

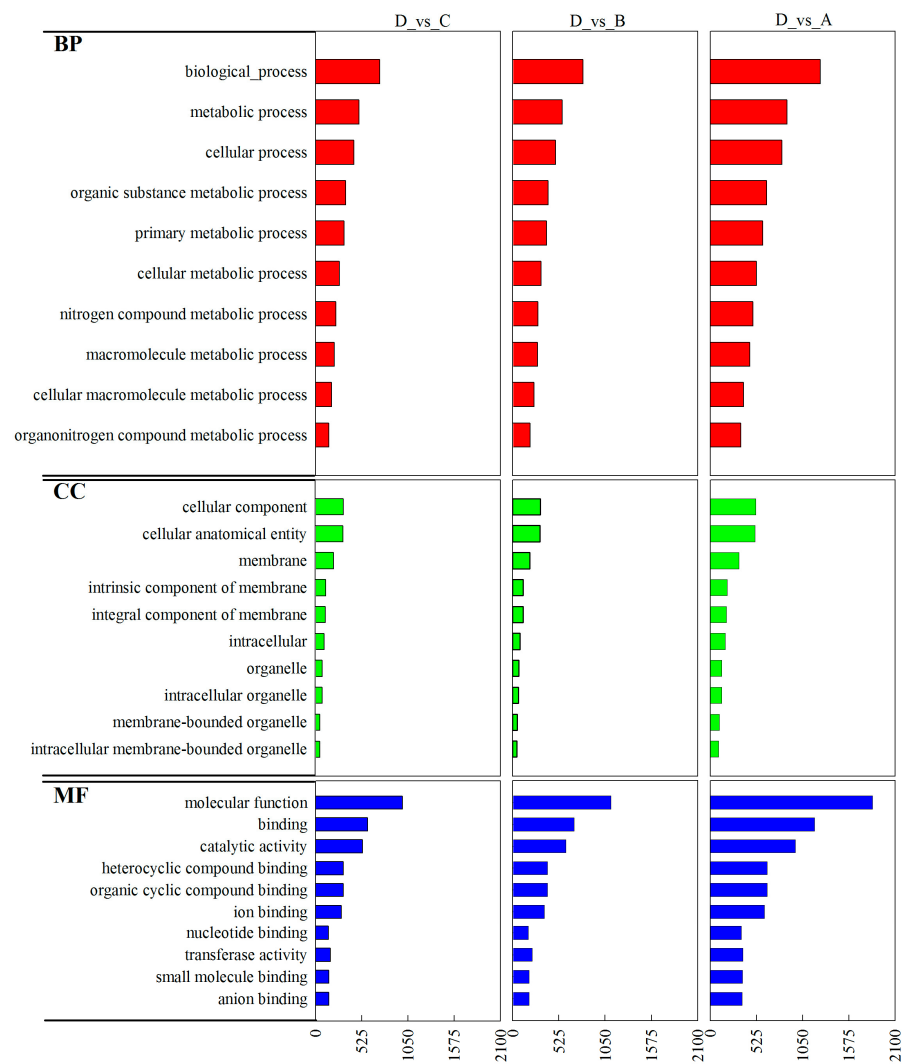

**Figure S1.** The distribution and number of DEGs in three main categories in the three pairwise comparisons. BP: biological process, CC: cellular component, MF: molecular function.

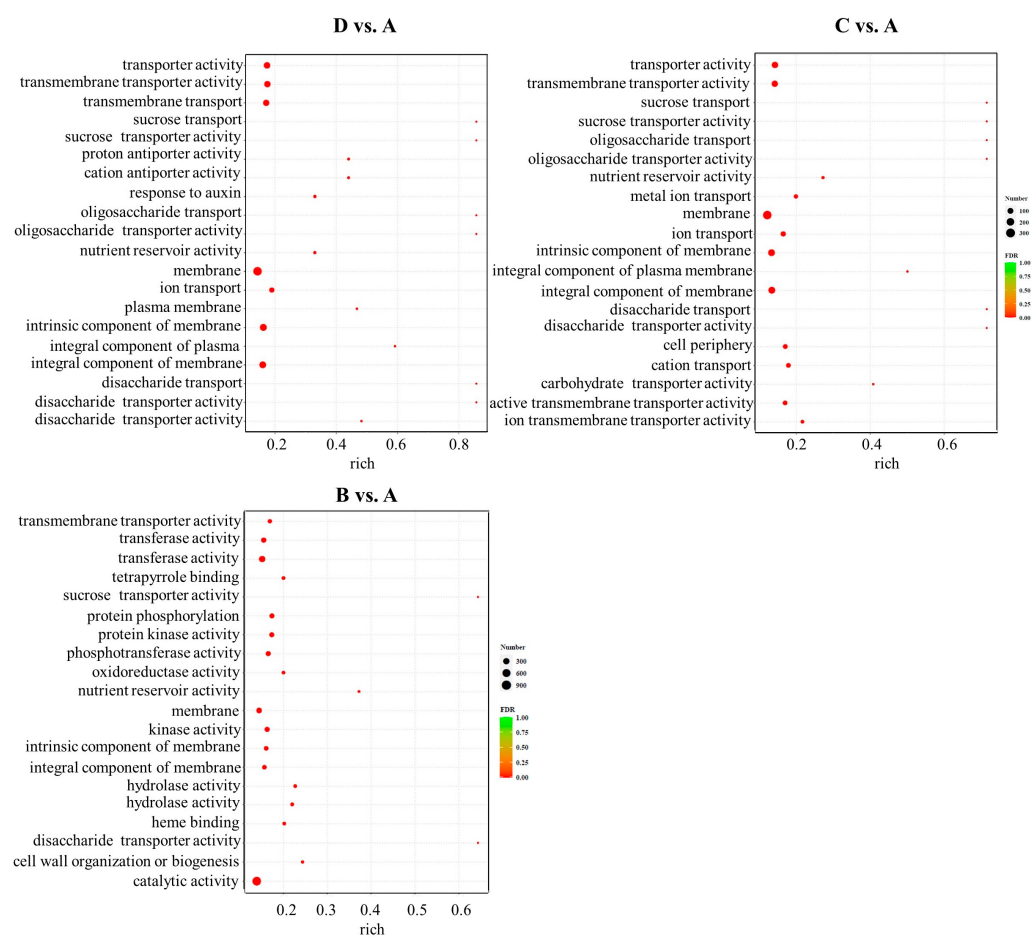

**Figure S3.** GO enrichment analysis of DEGs in the three pairwise comparison groups. The size of the dot indicates the number of DEGs and the color represents the  $q$ -value of the enrichment. The coloration scale and annotation are shown on the right side of the figure.

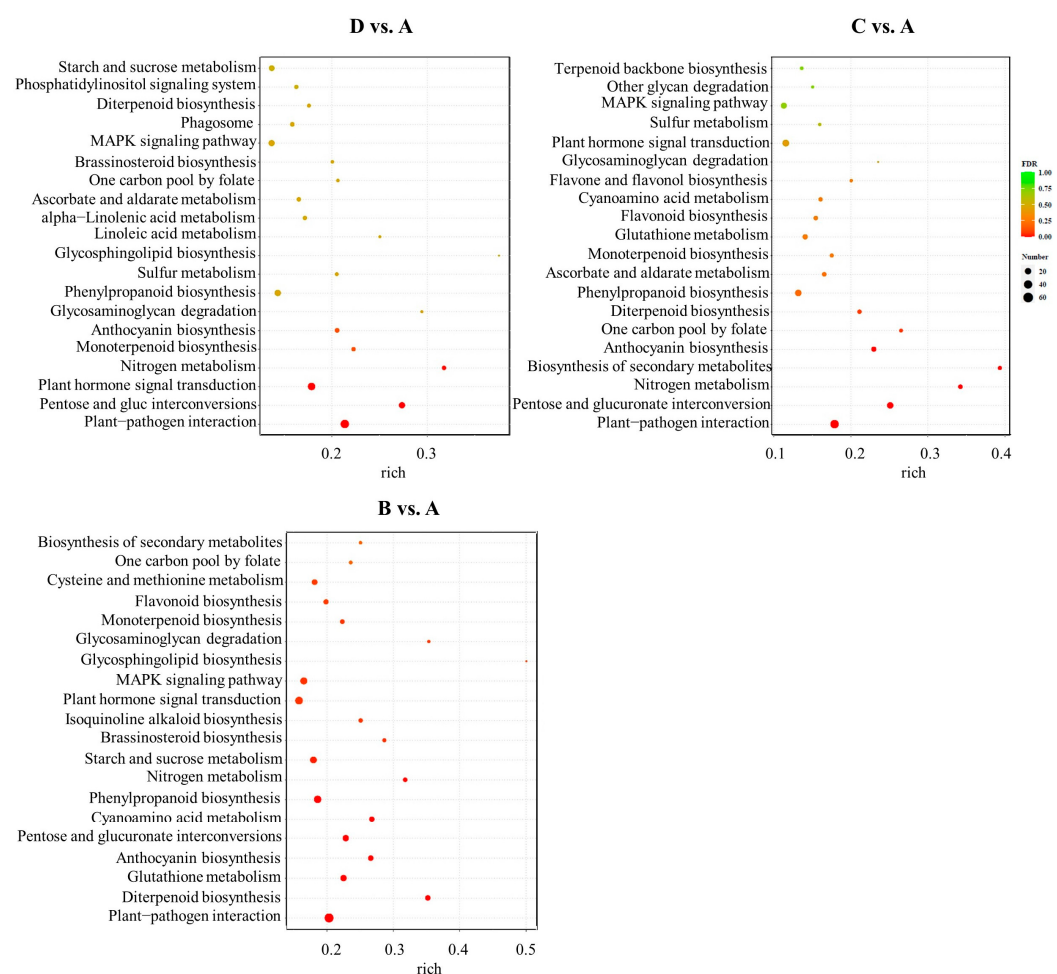

**Figure S4.** KEGG pathway enrichment analysis of the identified DEGs among the three comparison groups. The x-axis represents the rich factor, the y-axis indicates the name of the KEGG pathway. The size of the dot indicates the number of DEGs in each pathway while dot color represents the q-value of the enrichment.
