# Supplementary material for: Transcriptomic Analysis Reveals the Regulatory Mechanism of Color Diversity in Rhododendron pulchrum Sweet (Ericaceae)
Source: Plants (Basel). 2023 Jul 15;12(14):2656. doi: 10.3390/plants12142656 (PMC10384940; doi:10.3390/plants12142656)
Supplement: Supplementary file 1 [file plants-12-02656-s001.zip › Table S1.xlsx]

## Sheet: Sheet1
Table S1. The contant of anthocyanin components (mg kg-1)
Sample	Part	Delphinidin	Cyanidin	Pelargonidin	Peonidin	Malvidin	Total
Petal	A	455.84±6.15 b	198.46±9.92 b	1042.82±46.57 a	1658.52±69.46 a	133.72±6.28 a	3489.36±73.35 a
	B	474.81±11.43 a	245.87±10.35 a	976.36±22.14 b	537.26±15.60 b	132.75±1.64 a	2403.06±31.57 b
	C	269.40±11.07 c	129.04±4.16 c	728.51±6.57 c	347.74±20.98 c	111.16±11.53 b	1585.85±40.60 c
	D	/	/	/	/	/	/
Spot	A	482.02±23.49 a	325.20±13.14 b	726.82±12.65 a	3465.34±88.32 a	81.31±6.26 a	5080.69±103.27 a
	B	498.80±17.78 a	376.76±12.55 a	738.97±35.66 a	3205.54±141.82 b	70.34±5.57 b	4890.40±102.41 b
	C	361.95±17.40 b	162.44±6.04 c	578.00±38.36 b	1614.68±61.34 c	72.54±4.87 ab	2789.60±114.19 c
	D	61.17±7.14 c	42.47±2.21 d	77.23±6.42 c	114.51±13.05 d	28.46±3.32 c	323.85±25.66 d
Means are followed by ± Standard Error (SE). Different lowercase letters mean significant difference between treatments at n=3; P<0.05 level.
