# Supplementary material for: Transcriptomic Analysis Reveals the Regulatory Mechanism of Color Diversity in Rhododendron pulchrum Sweet (Ericaceae)
Source: Plants (Basel). 2023 Jul 15;12(14):2656. doi: 10.3390/plants12142656 (PMC10384940; doi:10.3390/plants12142656)
Supplement: Supplementary file 1 [file plants-12-02656-s001.zip › Table S2.xlsx]

## Sheet: Sheet1
Table S2: Primer sequences of genes used in qRT-PCR validation.
Gene ID	Primer sequence (5'-3')	Primer sequence (3'-5')
Rhsim01G0183400	TGTCTCCCACCTTGACTCCA	CCTTGTTGTTTGACGGCTCG
Rhsim02G0041100	ACCATTGCCCAGACGAACTT	AAGCCGTATTGGTCCGTGTT
Rhsim05G0162000	GACGACGTTCGACAATGCAG	TCGTCGCGAAGAGAGTGTTC
Rhsim09G0205300	AAGGCCAACGTCAACTCCAA	ATGGCTATTGTGGGCTTGCT
RhsimUnG0230300	AGGCGTTCATTGTGTCGGAT	ATAGTTCCACGCATCGCCAA
Rhsim10G0142100	TTCAAACAGGTGCAGTTGCC	TGGCATGAAAAACTGGCCCT
Rhsim09G0046700	GGGCTGATTACCCGCTAGTT	AGCATCTGGCAATTCACGCT
Rhsim04G0003100	GTCAAAAGGGCCGCTGAATG	ACCTATTCCGGCCTTTGCAT
