# Supplementary material for: Transcriptomic Analysis Reveals the Regulatory Mechanism of Color Diversity in Rhododendron pulchrum Sweet (Ericaceae)
Source: Plants (Basel). 2023 Jul 15;12(14):2656. doi: 10.3390/plants12142656 (PMC10384940; doi:10.3390/plants12142656)
Supplement: Supplementary file 1 [file plants-12-02656-s001.zip › Table S3.xlsx]

## Sheet: D_vs_A
Table S3: Significantly enriched GO terms in the three pairwise comparison groups
Category	GO.ID	Term	Up	Down	DEG	Pvalue	FDR	Up_Gene	Down_Gene
CC	GO:0016020	membrane	235	89	324	6.20065e-12	1.39018e-08	Rhsim01G0001800(Rhsim01G0001800),Rhsim01G0006600(Rhsim01G0006600),Rhsim01G0015800(Rhsim01G0015800),Rhsim01G0027200(Rhsim01G0027200),Rhsim01G0036400(Rhsim01G0036400),Rhsim01G0037600(Rhsim01G0037600),Rhsim01G0038300(Rhsim01G0038300),Rhsim01G0047700(Rhsim01G0047700),Rhsim01G0050600(Rhsim01G0050600),Rhsim01G0051000(Rhsim01G0051000),Rhsim01G0061200(Rhsim01G0061200),Rhsim01G0078700(Rhsim01G0078700),Rhs…	Rhsim01G0003600(Rhsim01G0003600),Rhsim01G0015700(Rhsim01G0015700),Rhsim01G0073500(Rhsim01G0073500),Rhsim01G0097800(Rhsim01G0097800),Rhsim01G0134300(Rhsim01G0134300),Rhsim01G0152600(Rhsim01G0152600),Rhsim02G0034700(Rhsim02G0034700),Rhsim02G0090600(Rhsim02G0090600),Rhsim02G0164900(Rhsim02G0164900),Rhsim02G0179200(Rhsim02G0179200),Rhsim02G0217300(Rhsim02G0217300),Rhsim03G0029800(Rhsim03G0029800),Rhs…
CC	GO:0031224	intrinsic component of membrane	143	48	191	1.41358e-10	6.90209e-08	Rhsim01G0001800(Rhsim01G0001800),Rhsim01G0015800(Rhsim01G0015800),Rhsim01G0027200(Rhsim01G0027200),Rhsim01G0036400(Rhsim01G0036400),Rhsim01G0037600(Rhsim01G0037600),Rhsim01G0038300(Rhsim01G0038300),Rhsim01G0047700(Rhsim01G0047700),Rhsim01G0050600(Rhsim01G0050600),Rhsim01G0051000(Rhsim01G0051000),Rhsim01G0061200(Rhsim01G0061200),Rhsim01G0078700(Rhsim01G0078700),Rhsim01G0106800(Rhsim01G0106800),Rhs…	Rhsim01G0003600(Rhsim01G0003600),Rhsim01G0015700(Rhsim01G0015700),Rhsim01G0073500(Rhsim01G0073500),Rhsim01G0134300(Rhsim01G0134300),Rhsim02G0164900(Rhsim02G0164900),Rhsim02G0217300(Rhsim02G0217300),Rhsim03G0199300(Rhsim03G0199300),Rhsim03G0199400(Rhsim03G0199400),Rhsim03G0237200(Rhsim03G0237200),Rhsim03G0249100(Rhsim03G0249100),Rhsim05G0087900(Rhsim05G0087900),Rhsim05G0145600(Rhsim05G0145600),Rhs…
MF	GO:0008515	sucrose transmembrane transporter activity	11	1	12	1.83121e-10	6.90209e-08	Rhsim11G0060400(Rhsim11G0060400),Rhsim11G0060500(Rhsim11G0060500),Rhsim11G0060600(Rhsim11G0060600),Rhsim11G0060700(Rhsim11G0060700),Rhsim11G0061200(Rhsim11G0061200),Rhsim11G0061500(Rhsim11G0061500),Rhsim11G0062600(Rhsim11G0062600),Rhsim11G0062900(Rhsim11G0062900),Rhsim11G0063000(Rhsim11G0063000),RhsimUnG0070000(RhsimUnG0070000),RhsimUnG0070100(RhsimUnG0070100)	Rhsim06G0098000(Rhsim06G0098000)
MF	GO:0015154	disaccharide transmembrane transporter activity	11	1	12	1.83121e-10	6.90209e-08	Rhsim11G0060400(Rhsim11G0060400),Rhsim11G0060500(Rhsim11G0060500),Rhsim11G0060600(Rhsim11G0060600),Rhsim11G0060700(Rhsim11G0060700),Rhsim11G0061200(Rhsim11G0061200),Rhsim11G0061500(Rhsim11G0061500),Rhsim11G0062600(Rhsim11G0062600),Rhsim11G0062900(Rhsim11G0062900),Rhsim11G0063000(Rhsim11G0063000),RhsimUnG0070000(RhsimUnG0070000),RhsimUnG0070100(RhsimUnG0070100)	Rhsim06G0098000(Rhsim06G0098000)
MF	GO:0015157	oligosaccharide transmembrane transporter activity	11	1	12	1.83121e-10	6.90209e-08	Rhsim11G0060400(Rhsim11G0060400),Rhsim11G0060500(Rhsim11G0060500),Rhsim11G0060600(Rhsim11G0060600),Rhsim11G0060700(Rhsim11G0060700),Rhsim11G0061200(Rhsim11G0061200),Rhsim11G0061500(Rhsim11G0061500),Rhsim11G0062600(Rhsim11G0062600),Rhsim11G0062900(Rhsim11G0062900),Rhsim11G0063000(Rhsim11G0063000),RhsimUnG0070000(RhsimUnG0070000),RhsimUnG0070100(RhsimUnG0070100)	Rhsim06G0098000(Rhsim06G0098000)
BP	GO:0015766	disaccharide transport	11	1	12	2.46283e-10	6.90209e-08	Rhsim11G0060400(Rhsim11G0060400),Rhsim11G0060500(Rhsim11G0060500),Rhsim11G0060600(Rhsim11G0060600),Rhsim11G0060700(Rhsim11G0060700),Rhsim11G0061200(Rhsim11G0061200),Rhsim11G0061500(Rhsim11G0061500),Rhsim11G0062600(Rhsim11G0062600),Rhsim11G0062900(Rhsim11G0062900),Rhsim11G0063000(Rhsim11G0063000),RhsimUnG0070000(RhsimUnG0070000),RhsimUnG0070100(RhsimUnG0070100)	Rhsim06G0098000(Rhsim06G0098000)
BP	GO:0015770	sucrose transport	11	1	12	2.46283e-10	6.90209e-08	Rhsim11G0060400(Rhsim11G0060400),Rhsim11G0060500(Rhsim11G0060500),Rhsim11G0060600(Rhsim11G0060600),Rhsim11G0060700(Rhsim11G0060700),Rhsim11G0061200(Rhsim11G0061200),Rhsim11G0061500(Rhsim11G0061500),Rhsim11G0062600(Rhsim11G0062600),Rhsim11G0062900(Rhsim11G0062900),Rhsim11G0063000(Rhsim11G0063000),RhsimUnG0070000(RhsimUnG0070000),RhsimUnG0070100(RhsimUnG0070100)	Rhsim06G0098000(Rhsim06G0098000)
BP	GO:0015772	oligosaccharide transport	11	1	12	2.46283e-10	6.90209e-08	Rhsim11G0060400(Rhsim11G0060400),Rhsim11G0060500(Rhsim11G0060500),Rhsim11G0060600(Rhsim11G0060600),Rhsim11G0060700(Rhsim11G0060700),Rhsim11G0061200(Rhsim11G0061200),Rhsim11G0061500(Rhsim11G0061500),Rhsim11G0062600(Rhsim11G0062600),Rhsim11G0062900(Rhsim11G0062900),Rhsim11G0063000(Rhsim11G0063000),RhsimUnG0070000(RhsimUnG0070000),RhsimUnG0070100(RhsimUnG0070100)	Rhsim06G0098000(Rhsim06G0098000)
CC	GO:0016021	integral component of membrane	140	46	186	7.8306e-10	1.95069e-07	Rhsim01G0001800(Rhsim01G0001800),Rhsim01G0015800(Rhsim01G0015800),Rhsim01G0027200(Rhsim01G0027200),Rhsim01G0036400(Rhsim01G0036400),Rhsim01G0037600(Rhsim01G0037600),Rhsim01G0038300(Rhsim01G0038300),Rhsim01G0047700(Rhsim01G0047700),Rhsim01G0050600(Rhsim01G0050600),Rhsim01G0051000(Rhsim01G0051000),Rhsim01G0061200(Rhsim01G0061200),Rhsim01G0078700(Rhsim01G0078700),Rhsim01G0106800(Rhsim01G0106800),Rhs…	Rhsim01G0003600(Rhsim01G0003600),Rhsim01G0073500(Rhsim01G0073500),Rhsim01G0134300(Rhsim01G0134300),Rhsim02G0164900(Rhsim02G0164900),Rhsim02G0217300(Rhsim02G0217300),Rhsim03G0199300(Rhsim03G0199300),Rhsim03G0199400(Rhsim03G0199400),Rhsim03G0237200(Rhsim03G0237200),Rhsim03G0249100(Rhsim03G0249100),Rhsim05G0087900(Rhsim05G0087900),Rhsim05G0145600(Rhsim05G0145600),Rhsim05G0183600(Rhsim05G0183600),Rhs…
MF	GO:0005215	transporter activity	117	45	162	1.13124e-09	2.53625e-07	Rhsim01G0001800(Rhsim01G0001800),Rhsim01G0038300(Rhsim01G0038300),Rhsim01G0148000(Rhsim01G0148000),Rhsim01G0180900(Rhsim01G0180900),Rhsim01G0233500(Rhsim01G0233500),Rhsim01G0233600(Rhsim01G0233600),Rhsim01G0264500(Rhsim01G0264500),Rhsim02G0008700(Rhsim02G0008700),Rhsim02G0014800(Rhsim02G0014800),Rhsim02G0015500(Rhsim02G0015500),Rhsim02G0020700(Rhsim02G0020700),Rhsim02G0030000(Rhsim02G0030000),Rhs…	Rhsim01G0073500(Rhsim01G0073500),Rhsim01G0130300(Rhsim01G0130300),Rhsim02G0179200(Rhsim02G0179200),Rhsim03G0237200(Rhsim03G0237200),Rhsim03G0249100(Rhsim03G0249100),Rhsim04G0147400(Rhsim04G0147400),Rhsim05G0040600(Rhsim05G0040600),Rhsim05G0145600(Rhsim05G0145600),Rhsim06G0019600(Rhsim06G0019600),Rhsim06G0085500(Rhsim06G0085500),Rhsim06G0098000(Rhsim06G0098000),Rhsim07G0010100(Rhsim07G0010100),Rhs…
MF	GO:0022857	transmembrane transporter activity	114	41	155	1.76797e-09	3.60344e-07	Rhsim01G0001800(Rhsim01G0001800),Rhsim01G0038300(Rhsim01G0038300),Rhsim01G0148000(Rhsim01G0148000),Rhsim01G0180900(Rhsim01G0180900),Rhsim01G0233500(Rhsim01G0233500),Rhsim01G0233600(Rhsim01G0233600),Rhsim01G0264500(Rhsim01G0264500),Rhsim02G0008700(Rhsim02G0008700),Rhsim02G0014800(Rhsim02G0014800),Rhsim02G0015500(Rhsim02G0015500),Rhsim02G0020700(Rhsim02G0020700),Rhsim02G0030000(Rhsim02G0030000),Rhs…	Rhsim01G0073500(Rhsim01G0073500),Rhsim02G0179200(Rhsim02G0179200),Rhsim03G0237200(Rhsim03G0237200),Rhsim03G0249100(Rhsim03G0249100),Rhsim04G0147400(Rhsim04G0147400),Rhsim05G0040600(Rhsim05G0040600),Rhsim05G0145600(Rhsim05G0145600),Rhsim06G0019600(Rhsim06G0019600),Rhsim06G0085500(Rhsim06G0085500),Rhsim06G0098000(Rhsim06G0098000),Rhsim07G0041800(Rhsim07G0041800),Rhsim07G0078400(Rhsim07G0078400),Rhs…
CC	GO:0005887	integral component of plasma membrane	12	1	13	4.55366e-08	8.50776e-06	Rhsim03G0120900(Rhsim03G0120900),Rhsim11G0060400(Rhsim11G0060400),Rhsim11G0060500(Rhsim11G0060500),Rhsim11G0060600(Rhsim11G0060600),Rhsim11G0060700(Rhsim11G0060700),Rhsim11G0061200(Rhsim11G0061200),Rhsim11G0061500(Rhsim11G0061500),Rhsim11G0062600(Rhsim11G0062600),Rhsim11G0062900(Rhsim11G0062900),Rhsim11G0063000(Rhsim11G0063000),RhsimUnG0070000(RhsimUnG0070000),RhsimUnG0070100(RhsimUnG0070100)	Rhsim06G0098000(Rhsim06G0098000)
MF	GO:0015298	solute:cation antiporter activity	17	1	18	6.60048e-08	1.05702e-05	Rhsim01G0148000(Rhsim01G0148000),Rhsim02G0008700(Rhsim02G0008700),Rhsim04G0215800(Rhsim04G0215800),Rhsim05G0226200(Rhsim05G0226200),Rhsim06G0181700(Rhsim06G0181700),Rhsim06G0225400(Rhsim06G0225400),Rhsim07G0056800(Rhsim07G0056800),Rhsim07G0176200(Rhsim07G0176200),Rhsim09G0181700(Rhsim09G0181700),Rhsim10G0203600(Rhsim10G0203600),Rhsim11G0005400(Rhsim11G0005400),Rhsim13G0063400(Rhsim13G0063400),Rhs…	Rhsim07G0179400(Rhsim07G0179400)
MF	GO:0015299	solute:proton antiporter activity	17	1	18	6.60048e-08	1.05702e-05	Rhsim01G0148000(Rhsim01G0148000),Rhsim02G0008700(Rhsim02G0008700),Rhsim04G0215800(Rhsim04G0215800),Rhsim05G0226200(Rhsim05G0226200),Rhsim06G0181700(Rhsim06G0181700),Rhsim06G0225400(Rhsim06G0225400),Rhsim07G0056800(Rhsim07G0056800),Rhsim07G0176200(Rhsim07G0176200),Rhsim09G0181700(Rhsim09G0181700),Rhsim10G0203600(Rhsim10G0203600),Rhsim11G0005400(Rhsim11G0005400),Rhsim13G0063400(Rhsim13G0063400),Rhs…	Rhsim07G0179400(Rhsim07G0179400)
BP	GO:0055085	transmembrane transport	107	40	147	7.30466e-08	1.0918e-05	Rhsim01G0038300(Rhsim01G0038300),Rhsim01G0050600(Rhsim01G0050600),Rhsim01G0148000(Rhsim01G0148000),Rhsim01G0180900(Rhsim01G0180900),Rhsim01G0233500(Rhsim01G0233500),Rhsim01G0233600(Rhsim01G0233600),Rhsim01G0264500(Rhsim01G0264500),Rhsim02G0008700(Rhsim02G0008700),Rhsim02G0014800(Rhsim02G0014800),Rhsim02G0015500(Rhsim02G0015500),Rhsim02G0020700(Rhsim02G0020700),Rhsim02G0030000(Rhsim02G0030000),Rhs…	Rhsim02G0179200(Rhsim02G0179200),Rhsim02G0251700(Rhsim02G0251700),Rhsim03G0211900(Rhsim03G0211900),Rhsim03G0237200(Rhsim03G0237200),Rhsim03G0249100(Rhsim03G0249100),Rhsim04G0147400(Rhsim04G0147400),Rhsim05G0040600(Rhsim05G0040600),Rhsim05G0087900(Rhsim05G0087900),Rhsim05G0145600(Rhsim05G0145600),Rhsim06G0019600(Rhsim06G0019600),Rhsim06G0085500(Rhsim06G0085500),Rhsim07G0021800(Rhsim07G0021800),Rhs…
BP	GO:0006811	ion transport	74	13	87	5.18699e-07	7.11526e-05	Rhsim01G0001800(Rhsim01G0001800),Rhsim01G0037600(Rhsim01G0037600),Rhsim01G0038300(Rhsim01G0038300),Rhsim01G0047700(Rhsim01G0047700),Rhsim01G0050600(Rhsim01G0050600),Rhsim01G0093900(Rhsim01G0093900),Rhsim01G0112200(Rhsim01G0112200),Rhsim01G0180900(Rhsim01G0180900),Rhsim01G0218600(Rhsim01G0218600),Rhsim01G0233500(Rhsim01G0233500),Rhsim01G0233600(Rhsim01G0233600),Rhsim01G0264500(Rhsim01G0264500),Rhs…	Rhsim01G0073500(Rhsim01G0073500),Rhsim03G0191700(Rhsim03G0191700),Rhsim03G0216700(Rhsim03G0216700),Rhsim04G0144200(Rhsim04G0144200),Rhsim06G0085500(Rhsim06G0085500),Rhsim07G0078400(Rhsim07G0078400),Rhsim07G0179400(Rhsim07G0179400),Rhsim07G0180900(Rhsim07G0180900),Rhsim09G0099500(Rhsim09G0099500),Rhsim10G0046800(Rhsim10G0046800),Rhsim13G0001800(Rhsim13G0001800),Rhsim13G0141800(Rhsim13G0141800),Rhs…
BP	GO:0009733	response to auxin	21	3	24	5.39516e-07	7.11526e-05	Rhsim01G0112200(Rhsim01G0112200),Rhsim05G0002700(Rhsim05G0002700),Rhsim05G0050100(Rhsim05G0050100),Rhsim05G0064400(Rhsim05G0064400),Rhsim05G0064600(Rhsim05G0064600),Rhsim05G0064700(Rhsim05G0064700),Rhsim05G0064900(Rhsim05G0064900),Rhsim05G0065100(Rhsim05G0065100),Rhsim05G0065500(Rhsim05G0065500),Rhsim05G0065600(Rhsim05G0065600),Rhsim05G0065700(Rhsim05G0065700),Rhsim05G0065800(Rhsim05G0065800),Rhs…	Rhsim01G0073500(Rhsim01G0073500),Rhsim01G0149700(Rhsim01G0149700),Rhsim04G0005000(Rhsim04G0005000)
MF	GO:0045735	nutrient reservoir activity	21	2	23	6.08984e-07	7.58523e-05	Rhsim01G0219300(Rhsim01G0219300),Rhsim01G0219400(Rhsim01G0219400),Rhsim01G0219600(Rhsim01G0219600),Rhsim01G0219800(Rhsim01G0219800),Rhsim01G0219900(Rhsim01G0219900),Rhsim01G0263800(Rhsim01G0263800),Rhsim01G0273000(Rhsim01G0273000),Rhsim08G0200100(Rhsim08G0200100),Rhsim08G0239200(Rhsim08G0239200),Rhsim09G0035200(Rhsim09G0035200),Rhsim09G0035300(Rhsim09G0035300),Rhsim09G0035400(Rhsim09G0035400),Rhs…	Rhsim08G0163100(Rhsim08G0163100),Rhsim09G0048800(Rhsim09G0048800)
CC	GO:0031226	intrinsic component of plasma membrane	13	1	14	6.80131e-07	8.02555e-05	Rhsim01G0161900(Rhsim01G0161900),Rhsim03G0120900(Rhsim03G0120900),Rhsim11G0060400(Rhsim11G0060400),Rhsim11G0060500(Rhsim11G0060500),Rhsim11G0060600(Rhsim11G0060600),Rhsim11G0060700(Rhsim11G0060700),Rhsim11G0061200(Rhsim11G0061200),Rhsim11G0061500(Rhsim11G0061500),Rhsim11G0062600(Rhsim11G0062600),Rhsim11G0062900(Rhsim11G0062900),Rhsim11G0063000(Rhsim11G0063000),RhsimUnG0070000(RhsimUnG0070000),Rhs…	Rhsim06G0098000(Rhsim06G0098000)
MF	GO:0015144	carbohydrate transmembrane transporter activity	11	2	13	1.23433e-06	0.000138368	Rhsim11G0060400(Rhsim11G0060400),Rhsim11G0060500(Rhsim11G0060500),Rhsim11G0060600(Rhsim11G0060600),Rhsim11G0060700(Rhsim11G0060700),Rhsim11G0061200(Rhsim11G0061200),Rhsim11G0061500(Rhsim11G0061500),Rhsim11G0062600(Rhsim11G0062600),Rhsim11G0062900(Rhsim11G0062900),Rhsim11G0063000(Rhsim11G0063000),RhsimUnG0070000(RhsimUnG0070000),RhsimUnG0070100(RhsimUnG0070100)	Rhsim06G0098000(Rhsim06G0098000),Rhsim10G0083700(Rhsim10G0083700)

## Sheet: C_vs_A
Category	GO.ID	Term	Up	Down	DEG	Pvalue	FDR	Up_Gene	Down_Gene
CC	GO:0016020	membrane	181	96	277	4.11145e-12	7.71719e-09	Rhsim01G0001800(Rhsim01G0001800),Rhsim01G0037600(Rhsim01G0037600),Rhsim01G0038300(Rhsim01G0038300),Rhsim01G0047700(Rhsim01G0047700),Rhsim01G0061200(Rhsim01G0061200),Rhsim01G0073500(Rhsim01G0073500),Rhsim01G0092900(Rhsim01G0092900),Rhsim01G0094000(Rhsim01G0094000),Rhsim01G0095600(Rhsim01G0095600),Rhsim01G0100100(Rhsim01G0100100),Rhsim01G0110000(Rhsim01G0110000),Rhsim01G0117200(Rhsim01G0117200),Rhs…	Rhsim01G0002800(Rhsim01G0002800),Rhsim01G0003600(Rhsim01G0003600),Rhsim01G0005600(Rhsim01G0005600),Rhsim01G0006000(Rhsim01G0006000),Rhsim01G0041100(Rhsim01G0041100),Rhsim01G0051000(Rhsim01G0051000),Rhsim01G0077700(Rhsim01G0077700),Rhsim01G0107200(Rhsim01G0107200),Rhsim01G0107600(Rhsim01G0107600),Rhsim01G0131400(Rhsim01G0131400),Rhsim01G0131700(Rhsim01G0131700),Rhsim01G0152600(Rhsim01G0152600),Rhs…
CC	GO:0031224	intrinsic component of membrane	112	46	158	1.3433e-08	8.79085e-06	Rhsim01G0001800(Rhsim01G0001800),Rhsim01G0037600(Rhsim01G0037600),Rhsim01G0038300(Rhsim01G0038300),Rhsim01G0047700(Rhsim01G0047700),Rhsim01G0061200(Rhsim01G0061200),Rhsim01G0073500(Rhsim01G0073500),Rhsim01G0095600(Rhsim01G0095600),Rhsim01G0110000(Rhsim01G0110000),Rhsim01G0120400(Rhsim01G0120400),Rhsim01G0148000(Rhsim01G0148000),Rhsim01G0229200(Rhsim01G0229200),Rhsim01G0233500(Rhsim01G0233500),Rhs…	Rhsim01G0003600(Rhsim01G0003600),Rhsim01G0041100(Rhsim01G0041100),Rhsim01G0051000(Rhsim01G0051000),Rhsim01G0077700(Rhsim01G0077700),Rhsim01G0107200(Rhsim01G0107200),Rhsim01G0107600(Rhsim01G0107600),Rhsim02G0000700(Rhsim02G0000700),Rhsim02G0164900(Rhsim02G0164900),Rhsim02G0240000(Rhsim02G0240000),Rhsim03G0196200(Rhsim03G0196200),Rhsim03G0249100(Rhsim03G0249100),Rhsim03G0265400(Rhsim03G0265400),Rhs…
CC	GO:0016021	integral component of membrane	111	45	156	1.40504e-08	8.79085e-06	Rhsim01G0001800(Rhsim01G0001800),Rhsim01G0037600(Rhsim01G0037600),Rhsim01G0038300(Rhsim01G0038300),Rhsim01G0047700(Rhsim01G0047700),Rhsim01G0061200(Rhsim01G0061200),Rhsim01G0073500(Rhsim01G0073500),Rhsim01G0095600(Rhsim01G0095600),Rhsim01G0110000(Rhsim01G0110000),Rhsim01G0120400(Rhsim01G0120400),Rhsim01G0148000(Rhsim01G0148000),Rhsim01G0229200(Rhsim01G0229200),Rhsim01G0233500(Rhsim01G0233500),Rhs…	Rhsim01G0003600(Rhsim01G0003600),Rhsim01G0041100(Rhsim01G0041100),Rhsim01G0051000(Rhsim01G0051000),Rhsim01G0077700(Rhsim01G0077700),Rhsim01G0107200(Rhsim01G0107200),Rhsim01G0107600(Rhsim01G0107600),Rhsim02G0000700(Rhsim02G0000700),Rhsim02G0164900(Rhsim02G0164900),Rhsim02G0240000(Rhsim02G0240000),Rhsim03G0196200(Rhsim03G0196200),Rhsim03G0249100(Rhsim03G0249100),Rhsim03G0265400(Rhsim03G0265400),Rhs…
MF	GO:0008515	sucrose transmembrane transporter activity	10	0	10	3.96479e-08	1.13772e-05	Rhsim11G0060500(Rhsim11G0060500),Rhsim11G0060600(Rhsim11G0060600),Rhsim11G0060700(Rhsim11G0060700),Rhsim11G0061200(Rhsim11G0061200),Rhsim11G0061500(Rhsim11G0061500),Rhsim11G0062600(Rhsim11G0062600),Rhsim11G0062900(Rhsim11G0062900),Rhsim11G0063000(Rhsim11G0063000),RhsimUnG0070000(RhsimUnG0070000),RhsimUnG0070100(RhsimUnG0070100)	-
MF	GO:0015154	disaccharide transmembrane transporter activity	10	0	10	3.96479e-08	1.13772e-05	Rhsim11G0060500(Rhsim11G0060500),Rhsim11G0060600(Rhsim11G0060600),Rhsim11G0060700(Rhsim11G0060700),Rhsim11G0061200(Rhsim11G0061200),Rhsim11G0061500(Rhsim11G0061500),Rhsim11G0062600(Rhsim11G0062600),Rhsim11G0062900(Rhsim11G0062900),Rhsim11G0063000(Rhsim11G0063000),RhsimUnG0070000(RhsimUnG0070000),RhsimUnG0070100(RhsimUnG0070100)	-
MF	GO:0015157	oligosaccharide transmembrane transporter activity	10	0	10	3.96479e-08	1.13772e-05	Rhsim11G0060500(Rhsim11G0060500),Rhsim11G0060600(Rhsim11G0060600),Rhsim11G0060700(Rhsim11G0060700),Rhsim11G0061200(Rhsim11G0061200),Rhsim11G0061500(Rhsim11G0061500),Rhsim11G0062600(Rhsim11G0062600),Rhsim11G0062900(Rhsim11G0062900),Rhsim11G0063000(Rhsim11G0063000),RhsimUnG0070000(RhsimUnG0070000),RhsimUnG0070100(RhsimUnG0070100)	-
BP	GO:0015766	disaccharide transport	10	0	10	5.45522e-08	1.13772e-05	Rhsim11G0060500(Rhsim11G0060500),Rhsim11G0060600(Rhsim11G0060600),Rhsim11G0060700(Rhsim11G0060700),Rhsim11G0061200(Rhsim11G0061200),Rhsim11G0061500(Rhsim11G0061500),Rhsim11G0062600(Rhsim11G0062600),Rhsim11G0062900(Rhsim11G0062900),Rhsim11G0063000(Rhsim11G0063000),RhsimUnG0070000(RhsimUnG0070000),RhsimUnG0070100(RhsimUnG0070100)	-
BP	GO:0015770	sucrose transport	10	0	10	5.45522e-08	1.13772e-05	Rhsim11G0060500(Rhsim11G0060500),Rhsim11G0060600(Rhsim11G0060600),Rhsim11G0060700(Rhsim11G0060700),Rhsim11G0061200(Rhsim11G0061200),Rhsim11G0061500(Rhsim11G0061500),Rhsim11G0062600(Rhsim11G0062600),Rhsim11G0062900(Rhsim11G0062900),Rhsim11G0063000(Rhsim11G0063000),RhsimUnG0070000(RhsimUnG0070000),RhsimUnG0070100(RhsimUnG0070100)	-
BP	GO:0015772	oligosaccharide transport	10	0	10	5.45522e-08	1.13772e-05	Rhsim11G0060500(Rhsim11G0060500),Rhsim11G0060600(Rhsim11G0060600),Rhsim11G0060700(Rhsim11G0060700),Rhsim11G0061200(Rhsim11G0061200),Rhsim11G0061500(Rhsim11G0061500),Rhsim11G0062600(Rhsim11G0062600),Rhsim11G0062900(Rhsim11G0062900),Rhsim11G0063000(Rhsim11G0063000),RhsimUnG0070000(RhsimUnG0070000),RhsimUnG0070100(RhsimUnG0070100)	-
CC	GO:0071944	cell periphery	42	19	61	4.31897e-07	8.10671e-05	Rhsim01G0001800(Rhsim01G0001800),Rhsim01G0037600(Rhsim01G0037600),Rhsim01G0038300(Rhsim01G0038300),Rhsim01G0047700(Rhsim01G0047700),Rhsim01G0061200(Rhsim01G0061200),Rhsim01G0073500(Rhsim01G0073500),Rhsim01G0095600(Rhsim01G0095600),Rhsim01G0100100(Rhsim01G0100100),Rhsim01G0110000(Rhsim01G0110000),Rhsim01G0117200(Rhsim01G0117200),Rhsim01G0123900(Rhsim01G0123900),Rhsim02G0006900(Rhsim02G0006900),Rhs…	Rhsim01G0002800(Rhsim01G0002800),Rhsim01G0003600(Rhsim01G0003600),Rhsim01G0005600(Rhsim01G0005600),Rhsim01G0041100(Rhsim01G0041100),Rhsim01G0077700(Rhsim01G0077700),Rhsim01G0125600(Rhsim01G0125600),Rhsim01G0125700(Rhsim01G0125700),Rhsim01G0131400(Rhsim01G0131400),Rhsim01G0131700(Rhsim01G0131700),Rhsim03G0127900(Rhsim03G0127900),Rhsim06G0117300(Rhsim06G0117300),Rhsim06G0137700(Rhsim06G0137700),Rhs…
CC	GO:0005887	integral component of plasma membrane	11	0	11	7.66298e-07	0.000130758	Rhsim03G0120900(Rhsim03G0120900),Rhsim11G0060500(Rhsim11G0060500),Rhsim11G0060600(Rhsim11G0060600),Rhsim11G0060700(Rhsim11G0060700),Rhsim11G0061200(Rhsim11G0061200),Rhsim11G0061500(Rhsim11G0061500),Rhsim11G0062600(Rhsim11G0062600),Rhsim11G0062900(Rhsim11G0062900),Rhsim11G0063000(Rhsim11G0063000),RhsimUnG0070000(RhsimUnG0070000),RhsimUnG0070100(RhsimUnG0070100)	-
MF	GO:0005215	transporter activity	94	39	133	1.74752e-06	0.000273341	Rhsim01G0001800(Rhsim01G0001800),Rhsim01G0038300(Rhsim01G0038300),Rhsim01G0073500(Rhsim01G0073500),Rhsim01G0095600(Rhsim01G0095600),Rhsim01G0118700(Rhsim01G0118700),Rhsim01G0148000(Rhsim01G0148000),Rhsim01G0233500(Rhsim01G0233500),Rhsim01G0233600(Rhsim01G0233600),Rhsim02G0015500(Rhsim02G0015500),Rhsim02G0030000(Rhsim02G0030000),Rhsim02G0030800(Rhsim02G0030800),Rhsim02G0031100(Rhsim02G0031100),Rhs…	Rhsim01G0002800(Rhsim01G0002800),Rhsim01G0215600(Rhsim01G0215600),Rhsim02G0000700(Rhsim02G0000700),Rhsim02G0240000(Rhsim02G0240000),Rhsim03G0196200(Rhsim03G0196200),Rhsim03G0249100(Rhsim03G0249100),Rhsim04G0100500(Rhsim04G0100500),Rhsim04G0115700(Rhsim04G0115700),Rhsim05G0040600(Rhsim05G0040600),Rhsim05G0145600(Rhsim05G0145600),Rhsim06G0019600(Rhsim06G0019600),Rhsim06G0085500(Rhsim06G0085500),Rhs…
MF	GO:0022857	transmembrane transporter activity	89	37	126	4.09693e-06	0.000591534	Rhsim01G0001800(Rhsim01G0001800),Rhsim01G0038300(Rhsim01G0038300),Rhsim01G0073500(Rhsim01G0073500),Rhsim01G0095600(Rhsim01G0095600),Rhsim01G0148000(Rhsim01G0148000),Rhsim01G0233500(Rhsim01G0233500),Rhsim01G0233600(Rhsim01G0233600),Rhsim02G0015500(Rhsim02G0015500),Rhsim02G0030000(Rhsim02G0030000),Rhsim02G0030800(Rhsim02G0030800),Rhsim02G0031100(Rhsim02G0031100),Rhsim02G0037800(Rhsim02G0037800),Rhs…	Rhsim01G0002800(Rhsim01G0002800),Rhsim01G0215600(Rhsim01G0215600),Rhsim02G0000700(Rhsim02G0000700),Rhsim02G0240000(Rhsim02G0240000),Rhsim03G0196200(Rhsim03G0196200),Rhsim03G0249100(Rhsim03G0249100),Rhsim04G0100500(Rhsim04G0100500),Rhsim04G0115700(Rhsim04G0115700),Rhsim05G0040600(Rhsim05G0040600),Rhsim05G0145600(Rhsim05G0145600),Rhsim06G0019600(Rhsim06G0019600),Rhsim06G0085500(Rhsim06G0085500),Rhs…
BP	GO:0006811	ion transport	65	11	76	4.64275e-06	0.000622461	Rhsim01G0001800(Rhsim01G0001800),Rhsim01G0037600(Rhsim01G0037600),Rhsim01G0038300(Rhsim01G0038300),Rhsim01G0047700(Rhsim01G0047700),Rhsim01G0073500(Rhsim01G0073500),Rhsim01G0092800(Rhsim01G0092800),Rhsim01G0093900(Rhsim01G0093900),Rhsim01G0095600(Rhsim01G0095600),Rhsim01G0233500(Rhsim01G0233500),Rhsim01G0233600(Rhsim01G0233600),Rhsim02G0030000(Rhsim02G0030000),Rhsim02G0030800(Rhsim02G0030800),Rhs…	Rhsim01G0002800(Rhsim01G0002800),Rhsim01G0215600(Rhsim01G0215600),Rhsim03G0191700(Rhsim03G0191700),Rhsim04G0144200(Rhsim04G0144200),Rhsim06G0085500(Rhsim06G0085500),Rhsim07G0180900(Rhsim07G0180900),Rhsim08G0206400(Rhsim08G0206400),Rhsim08G0235400(Rhsim08G0235400),Rhsim09G0204800(Rhsim09G0204800),Rhsim12G0176600(Rhsim12G0176600),Rhsim13G0141800(Rhsim13G0141800)
BP	GO:0030001	metal ion transport	36	7	43	5.15194e-06	0.000644679	Rhsim01G0001800(Rhsim01G0001800),Rhsim01G0092800(Rhsim01G0092800),Rhsim01G0093900(Rhsim01G0093900),Rhsim01G0233500(Rhsim01G0233500),Rhsim01G0233600(Rhsim01G0233600),Rhsim02G0030000(Rhsim02G0030000),Rhsim02G0030800(Rhsim02G0030800),Rhsim02G0031100(Rhsim02G0031100),Rhsim02G0037800(Rhsim02G0037800),Rhsim02G0193800(Rhsim02G0193800),Rhsim03G0054600(Rhsim03G0054600),Rhsim03G0146700(Rhsim03G0146700),Rhs…	Rhsim01G0215600(Rhsim01G0215600),Rhsim03G0191700(Rhsim03G0191700),Rhsim04G0144200(Rhsim04G0144200),Rhsim07G0180900(Rhsim07G0180900),Rhsim08G0206400(Rhsim08G0206400),Rhsim12G0176600(Rhsim12G0176600),Rhsim13G0141800(Rhsim13G0141800)
BP	GO:0006812	cation transport	48	7	55	9.03766e-06	0.00106023	Rhsim01G0001800(Rhsim01G0001800),Rhsim01G0038300(Rhsim01G0038300),Rhsim01G0092800(Rhsim01G0092800),Rhsim01G0093900(Rhsim01G0093900),Rhsim01G0233500(Rhsim01G0233500),Rhsim01G0233600(Rhsim01G0233600),Rhsim02G0030000(Rhsim02G0030000),Rhsim02G0030800(Rhsim02G0030800),Rhsim02G0031100(Rhsim02G0031100),Rhsim02G0037800(Rhsim02G0037800),Rhsim02G0193800(Rhsim02G0193800),Rhsim03G0003100(Rhsim03G0003100),Rhs…	Rhsim01G0215600(Rhsim01G0215600),Rhsim03G0191700(Rhsim03G0191700),Rhsim04G0144200(Rhsim04G0144200),Rhsim07G0180900(Rhsim07G0180900),Rhsim08G0206400(Rhsim08G0206400),Rhsim12G0176600(Rhsim12G0176600),Rhsim13G0141800(Rhsim13G0141800)
MF	GO:0022853	active ion transmembrane transporter activity	28	2	30	1.3615e-05	0.00150326	Rhsim01G0038300(Rhsim01G0038300),Rhsim01G0073500(Rhsim01G0073500),Rhsim01G0095600(Rhsim01G0095600),Rhsim01G0148000(Rhsim01G0148000),Rhsim02G0030000(Rhsim02G0030000),Rhsim02G0030800(Rhsim02G0030800),Rhsim02G0031100(Rhsim02G0031100),Rhsim02G0037800(Rhsim02G0037800),Rhsim02G0193700(Rhsim02G0193700),Rhsim04G0215800(Rhsim04G0215800),Rhsim05G0226200(Rhsim05G0226200),Rhsim06G0181700(Rhsim06G0181700),Rhs…	Rhsim01G0002800(Rhsim01G0002800),Rhsim06G0085500(Rhsim06G0085500)
MF	GO:0015144	carbohydrate transmembrane transporter activity	10	1	11	1.65361e-05	0.0016601	Rhsim11G0060500(Rhsim11G0060500),Rhsim11G0060600(Rhsim11G0060600),Rhsim11G0060700(Rhsim11G0060700),Rhsim11G0061200(Rhsim11G0061200),Rhsim11G0061500(Rhsim11G0061500),Rhsim11G0062600(Rhsim11G0062600),Rhsim11G0062900(Rhsim11G0062900),Rhsim11G0063000(Rhsim11G0063000),RhsimUnG0070000(RhsimUnG0070000),RhsimUnG0070100(RhsimUnG0070100)	Rhsim10G0083700(Rhsim10G0083700)
MF	GO:0022804	active transmembrane transporter activity	38	17	55	1.68044e-05	0.0016601	Rhsim01G0038300(Rhsim01G0038300),Rhsim01G0073500(Rhsim01G0073500),Rhsim01G0095600(Rhsim01G0095600),Rhsim01G0148000(Rhsim01G0148000),Rhsim02G0030000(Rhsim02G0030000),Rhsim02G0030800(Rhsim02G0030800),Rhsim02G0031100(Rhsim02G0031100),Rhsim02G0037800(Rhsim02G0037800),Rhsim02G0193700(Rhsim02G0193700),Rhsim02G0207200(Rhsim02G0207200),Rhsim04G0215800(Rhsim04G0215800),Rhsim05G0039300(Rhsim05G0039300),Rhs…	Rhsim01G0002800(Rhsim01G0002800),Rhsim02G0240000(Rhsim02G0240000),Rhsim04G0100500(Rhsim04G0100500),Rhsim06G0019600(Rhsim06G0019600),Rhsim06G0085500(Rhsim06G0085500),Rhsim06G0226900(Rhsim06G0226900),Rhsim07G0129100(Rhsim07G0129100),Rhsim09G0199700(Rhsim09G0199700),Rhsim10G0075100(Rhsim10G0075100),Rhsim12G0042900(Rhsim12G0042900),Rhsim12G0089100(Rhsim12G0089100),Rhsim12G0111200(Rhsim12G0111200),Rhs…
MF	GO:0045735	nutrient reservoir activity	12	7	19	1.8198e-05	0.00170788	Rhsim01G0219400(Rhsim01G0219400),Rhsim01G0219800(Rhsim01G0219800),Rhsim09G0035200(Rhsim09G0035200),Rhsim09G0035300(Rhsim09G0035300),Rhsim09G0035400(Rhsim09G0035400),Rhsim11G0107400(Rhsim11G0107400),Rhsim11G0108200(Rhsim11G0108200),Rhsim11G0110600(Rhsim11G0110600),Rhsim11G0110700(Rhsim11G0110700),Rhsim11G0110900(Rhsim11G0110900),Rhsim13G0035200(Rhsim13G0035200),RhsimUnG0165700(RhsimUnG0165700)	Rhsim08G0239200(Rhsim08G0239200),Rhsim09G0048800(Rhsim09G0048800),Rhsim11G0108300(Rhsim11G0108300),Rhsim11G0108400(Rhsim11G0108400),Rhsim11G0109900(Rhsim11G0109900),Rhsim13G0092600(Rhsim13G0092600),RhsimUnG0088700(RhsimUnG0088700)

## Sheet: B_vs_A
Category	GO.ID	Term	Up	Down	DEG	Pvalue	FDR	Up_Gene	Down_Gene
MF	GO:0003824	catalytic activity	601	519	1120	1.56461e-13	3.28724e-10	Rhsim01G0004600(Rhsim01G0004600),Rhsim01G0006600(Rhsim01G0006600),Rhsim01G0008100(Rhsim01G0008100),Rhsim01G0026000(Rhsim01G0026000),Rhsim01G0026200(Rhsim01G0026200),Rhsim01G0036400(Rhsim01G0036400),Rhsim01G0037400(Rhsim01G0037400),Rhsim01G0078700(Rhsim01G0078700),Rhsim01G0090300(Rhsim01G0090300),Rhsim01G0103400(Rhsim01G0103400),Rhsim01G0106800(Rhsim01G0106800),Rhsim01G0110000(Rhsim01G0110000),Rhs…	Rhsim01G0003600(Rhsim01G0003600),Rhsim01G0005600(Rhsim01G0005600),Rhsim01G0006400(Rhsim01G0006400),Rhsim01G0009900(Rhsim01G0009900),Rhsim01G0038600(Rhsim01G0038600),Rhsim01G0040100(Rhsim01G0040100),Rhsim01G0040600(Rhsim01G0040600),Rhsim01G0055400(Rhsim01G0055400),Rhsim01G0056500(Rhsim01G0056500),Rhsim01G0064400(Rhsim01G0064400),Rhsim01G0068200(Rhsim01G0068200),Rhsim01G0075600(Rhsim01G0075600),Rhs…
CC	GO:0016020	membrane	204	129	333	8.74411e-13	9.18569e-10	Rhsim01G0001800(Rhsim01G0001800),Rhsim01G0006600(Rhsim01G0006600),Rhsim01G0036400(Rhsim01G0036400),Rhsim01G0038300(Rhsim01G0038300),Rhsim01G0073500(Rhsim01G0073500),Rhsim01G0078700(Rhsim01G0078700),Rhsim01G0092900(Rhsim01G0092900),Rhsim01G0094000(Rhsim01G0094000),Rhsim01G0100100(Rhsim01G0100100),Rhsim01G0106800(Rhsim01G0106800),Rhsim01G0110000(Rhsim01G0110000),Rhsim01G0112500(Rhsim01G0112500),Rhs…	Rhsim01G0003600(Rhsim01G0003600),Rhsim01G0005600(Rhsim01G0005600),Rhsim01G0015700(Rhsim01G0015700),Rhsim01G0040100(Rhsim01G0040100),Rhsim01G0051000(Rhsim01G0051000),Rhsim01G0051100(Rhsim01G0051100),Rhsim01G0056500(Rhsim01G0056500),Rhsim01G0064400(Rhsim01G0064400),Rhsim01G0077700(Rhsim01G0077700),Rhsim01G0107200(Rhsim01G0107200),Rhsim01G0107400(Rhsim01G0107400),Rhsim01G0107600(Rhsim01G0107600),Rhs…
MF	GO:0004672	protein kinase activity	89	150	239	3.2095e-10	2.24772e-07	Rhsim01G0036400(Rhsim01G0036400),Rhsim01G0103400(Rhsim01G0103400),Rhsim01G0110000(Rhsim01G0110000),Rhsim01G0192100(Rhsim01G0192100),Rhsim01G0291900(Rhsim01G0291900),Rhsim02G0053300(Rhsim02G0053300),Rhsim02G0064700(Rhsim02G0064700),Rhsim02G0071400(Rhsim02G0071400),Rhsim02G0076200(Rhsim02G0076200),Rhsim02G0077100(Rhsim02G0077100),Rhsim02G0089600(Rhsim02G0089600),Rhsim03G0018700(Rhsim03G0018700),Rhs…	Rhsim01G0003600(Rhsim01G0003600),Rhsim01G0040100(Rhsim01G0040100),Rhsim01G0040600(Rhsim01G0040600),Rhsim01G0077700(Rhsim01G0077700),Rhsim01G0230400(Rhsim01G0230400),Rhsim01G0278100(Rhsim01G0278100),Rhsim02G0012400(Rhsim02G0012400),Rhsim02G0032400(Rhsim02G0032400),Rhsim02G0063300(Rhsim02G0063300),Rhsim02G0063400(Rhsim02G0063400),Rhsim02G0063500(Rhsim02G0063500),Rhsim02G0063800(Rhsim02G0063800),Rhs…
MF	GO:0016740	transferase activity	219	275	494	4.32739e-10	2.27296e-07	Rhsim01G0004600(Rhsim01G0004600),Rhsim01G0006600(Rhsim01G0006600),Rhsim01G0008100(Rhsim01G0008100),Rhsim01G0026000(Rhsim01G0026000),Rhsim01G0026200(Rhsim01G0026200),Rhsim01G0036400(Rhsim01G0036400),Rhsim01G0090300(Rhsim01G0090300),Rhsim01G0103400(Rhsim01G0103400),Rhsim01G0110000(Rhsim01G0110000),Rhsim01G0192100(Rhsim01G0192100),Rhsim01G0212400(Rhsim01G0212400),Rhsim01G0214200(Rhsim01G0214200),Rhs…	Rhsim01G0003600(Rhsim01G0003600),Rhsim01G0005600(Rhsim01G0005600),Rhsim01G0006400(Rhsim01G0006400),Rhsim01G0009900(Rhsim01G0009900),Rhsim01G0040100(Rhsim01G0040100),Rhsim01G0040600(Rhsim01G0040600),Rhsim01G0055400(Rhsim01G0055400),Rhsim01G0068200(Rhsim01G0068200),Rhsim01G0075600(Rhsim01G0075600),Rhsim01G0077700(Rhsim01G0077700),Rhsim01G0125500(Rhsim01G0125500),Rhsim01G0125600(Rhsim01G0125600),Rhs…
CC	GO:0031224	intrinsic component of membrane	121	71	192	6.06339e-10	2.54784e-07	Rhsim01G0001800(Rhsim01G0001800),Rhsim01G0036400(Rhsim01G0036400),Rhsim01G0038300(Rhsim01G0038300),Rhsim01G0073500(Rhsim01G0073500),Rhsim01G0078700(Rhsim01G0078700),Rhsim01G0106800(Rhsim01G0106800),Rhsim01G0110000(Rhsim01G0110000),Rhsim01G0112500(Rhsim01G0112500),Rhsim01G0120400(Rhsim01G0120400),Rhsim01G0144300(Rhsim01G0144300),Rhsim01G0148000(Rhsim01G0148000),Rhsim01G0158800(Rhsim01G0158800),Rhs…	Rhsim01G0003600(Rhsim01G0003600),Rhsim01G0015700(Rhsim01G0015700),Rhsim01G0040100(Rhsim01G0040100),Rhsim01G0051000(Rhsim01G0051000),Rhsim01G0051100(Rhsim01G0051100),Rhsim01G0056500(Rhsim01G0056500),Rhsim01G0064400(Rhsim01G0064400),Rhsim01G0077700(Rhsim01G0077700),Rhsim01G0107200(Rhsim01G0107200),Rhsim01G0107400(Rhsim01G0107400),Rhsim01G0107600(Rhsim01G0107600),Rhsim01G0107800(Rhsim01G0107800),Rhs…
MF	GO:0004553	hydrolase activity, hydrolyzing O-glycosyl compounds	53	35	88	9.68152e-10	3.39015e-07	Rhsim01G0006600(Rhsim01G0006600),Rhsim01G0037400(Rhsim01G0037400),Rhsim01G0192700(Rhsim01G0192700),Rhsim01G0197800(Rhsim01G0197800),Rhsim02G0075400(Rhsim02G0075400),Rhsim02G0111000(Rhsim02G0111000),Rhsim03G0073700(Rhsim03G0073700),Rhsim03G0090400(Rhsim03G0090400),Rhsim03G0232400(Rhsim03G0232400),Rhsim04G0050500(Rhsim04G0050500),Rhsim04G0051200(Rhsim04G0051200),Rhsim04G0082300(Rhsim04G0082300),Rhs…	Rhsim01G0005600(Rhsim01G0005600),Rhsim01G0006400(Rhsim01G0006400),Rhsim01G0038600(Rhsim01G0038600),Rhsim01G0125500(Rhsim01G0125500),Rhsim01G0125600(Rhsim01G0125600),Rhsim01G0125700(Rhsim01G0125700),Rhsim01G0192900(Rhsim01G0192900),Rhsim01G0193100(Rhsim01G0193100),Rhsim01G0193200(Rhsim01G0193200),Rhsim01G0235100(Rhsim01G0235100),Rhsim01G0286900(Rhsim01G0286900),Rhsim03G0038800(Rhsim03G0038800),Rhs…
MF	GO:0016798	hydrolase activity, acting on glycosyl bonds	53	37	90	3.06269e-09	9.19244e-07	Rhsim01G0006600(Rhsim01G0006600),Rhsim01G0037400(Rhsim01G0037400),Rhsim01G0192700(Rhsim01G0192700),Rhsim01G0197800(Rhsim01G0197800),Rhsim02G0075400(Rhsim02G0075400),Rhsim02G0111000(Rhsim02G0111000),Rhsim03G0073700(Rhsim03G0073700),Rhsim03G0090400(Rhsim03G0090400),Rhsim03G0232400(Rhsim03G0232400),Rhsim04G0050500(Rhsim04G0050500),Rhsim04G0051200(Rhsim04G0051200),Rhsim04G0082300(Rhsim04G0082300),Rhs…	Rhsim01G0005600(Rhsim01G0005600),Rhsim01G0006400(Rhsim01G0006400),Rhsim01G0038600(Rhsim01G0038600),Rhsim01G0125500(Rhsim01G0125500),Rhsim01G0125600(Rhsim01G0125600),Rhsim01G0125700(Rhsim01G0125700),Rhsim01G0192900(Rhsim01G0192900),Rhsim01G0193100(Rhsim01G0193100),Rhsim01G0193200(Rhsim01G0193200),Rhsim01G0235100(Rhsim01G0235100),Rhsim01G0286900(Rhsim01G0286900),Rhsim02G0203600(Rhsim02G0203600),Rhs…
MF	GO:0016773	phosphotransferase activity, alcohol group as acceptor	96	152	248	1.42581e-08	3.74453e-06	Rhsim01G0036400(Rhsim01G0036400),Rhsim01G0103400(Rhsim01G0103400),Rhsim01G0110000(Rhsim01G0110000),Rhsim01G0192100(Rhsim01G0192100),Rhsim01G0291900(Rhsim01G0291900),Rhsim02G0053300(Rhsim02G0053300),Rhsim02G0064700(Rhsim02G0064700),Rhsim02G0071400(Rhsim02G0071400),Rhsim02G0076200(Rhsim02G0076200),Rhsim02G0077100(Rhsim02G0077100),Rhsim02G0089600(Rhsim02G0089600),Rhsim03G0018700(Rhsim03G0018700),Rhs…	Rhsim01G0003600(Rhsim01G0003600),Rhsim01G0040100(Rhsim01G0040100),Rhsim01G0040600(Rhsim01G0040600),Rhsim01G0077700(Rhsim01G0077700),Rhsim01G0230400(Rhsim01G0230400),Rhsim01G0278100(Rhsim01G0278100),Rhsim02G0012400(Rhsim02G0012400),Rhsim02G0032400(Rhsim02G0032400),Rhsim02G0063300(Rhsim02G0063300),Rhsim02G0063400(Rhsim02G0063400),Rhsim02G0063500(Rhsim02G0063500),Rhsim02G0063800(Rhsim02G0063800),Rhs…
CC	GO:0016021	integral component of membrane	116	68	184	1.77444e-08	4.14233e-06	Rhsim01G0001800(Rhsim01G0001800),Rhsim01G0036400(Rhsim01G0036400),Rhsim01G0038300(Rhsim01G0038300),Rhsim01G0073500(Rhsim01G0073500),Rhsim01G0078700(Rhsim01G0078700),Rhsim01G0106800(Rhsim01G0106800),Rhsim01G0110000(Rhsim01G0110000),Rhsim01G0112500(Rhsim01G0112500),Rhsim01G0120400(Rhsim01G0120400),Rhsim01G0144300(Rhsim01G0144300),Rhsim01G0148000(Rhsim01G0148000),Rhsim01G0158800(Rhsim01G0158800),Rhs…	Rhsim01G0003600(Rhsim01G0003600),Rhsim01G0040100(Rhsim01G0040100),Rhsim01G0051000(Rhsim01G0051000),Rhsim01G0051100(Rhsim01G0051100),Rhsim01G0056500(Rhsim01G0056500),Rhsim01G0064400(Rhsim01G0064400),Rhsim01G0077700(Rhsim01G0077700),Rhsim01G0107200(Rhsim01G0107200),Rhsim01G0107400(Rhsim01G0107400),Rhsim01G0107600(Rhsim01G0107600),Rhsim01G0107800(Rhsim01G0107800),Rhsim01G0134300(Rhsim01G0134300),Rhs…
MF	GO:0016301	kinase activity	99	155	254	3.68033e-08	7.14011e-06	Rhsim01G0004600(Rhsim01G0004600),Rhsim01G0036400(Rhsim01G0036400),Rhsim01G0103400(Rhsim01G0103400),Rhsim01G0110000(Rhsim01G0110000),Rhsim01G0192100(Rhsim01G0192100),Rhsim01G0291900(Rhsim01G0291900),Rhsim02G0053300(Rhsim02G0053300),Rhsim02G0064700(Rhsim02G0064700),Rhsim02G0071400(Rhsim02G0071400),Rhsim02G0076200(Rhsim02G0076200),Rhsim02G0077100(Rhsim02G0077100),Rhsim02G0089600(Rhsim02G0089600),Rhs…	Rhsim01G0003600(Rhsim01G0003600),Rhsim01G0040100(Rhsim01G0040100),Rhsim01G0040600(Rhsim01G0040600),Rhsim01G0077700(Rhsim01G0077700),Rhsim01G0220200(Rhsim01G0220200),Rhsim01G0230400(Rhsim01G0230400),Rhsim01G0278100(Rhsim01G0278100),Rhsim02G0012400(Rhsim02G0012400),Rhsim02G0032400(Rhsim02G0032400),Rhsim02G0063300(Rhsim02G0063300),Rhsim02G0063400(Rhsim02G0063400),Rhsim02G0063500(Rhsim02G0063500),Rhs…
MF	GO:0045735	nutrient reservoir activity	17	9	26	3.73828e-08	7.14011e-06	Rhsim01G0219300(Rhsim01G0219300),Rhsim01G0219400(Rhsim01G0219400),Rhsim01G0219600(Rhsim01G0219600),Rhsim01G0219700(Rhsim01G0219700),Rhsim01G0219800(Rhsim01G0219800),Rhsim01G0219900(Rhsim01G0219900),Rhsim01G0220000(Rhsim01G0220000),Rhsim01G0263800(Rhsim01G0263800),Rhsim01G0273000(Rhsim01G0273000),Rhsim09G0035200(Rhsim09G0035200),Rhsim09G0035300(Rhsim09G0035300),Rhsim09G0035400(Rhsim09G0035400),Rhs…	Rhsim08G0163100(Rhsim08G0163100),Rhsim09G0048800(Rhsim09G0048800),Rhsim11G0108000(Rhsim11G0108000),Rhsim11G0108100(Rhsim11G0108100),Rhsim11G0108300(Rhsim11G0108300),Rhsim11G0109900(Rhsim11G0109900),Rhsim13G0092600(Rhsim13G0092600),RhsimUnG0088600(RhsimUnG0088600),RhsimUnG0088700(RhsimUnG0088700)
BP	GO:0006468	protein phosphorylation	88	145	233	5.37609e-08	9.41264e-06	Rhsim01G0036400(Rhsim01G0036400),Rhsim01G0103400(Rhsim01G0103400),Rhsim01G0192100(Rhsim01G0192100),Rhsim01G0291900(Rhsim01G0291900),Rhsim02G0053300(Rhsim02G0053300),Rhsim02G0064700(Rhsim02G0064700),Rhsim02G0071400(Rhsim02G0071400),Rhsim02G0076200(Rhsim02G0076200),Rhsim02G0077100(Rhsim02G0077100),Rhsim02G0089600(Rhsim02G0089600),Rhsim03G0018700(Rhsim03G0018700),Rhsim03G0154300(Rhsim03G0154300),Rhs…	Rhsim01G0003600(Rhsim01G0003600),Rhsim01G0040100(Rhsim01G0040100),Rhsim01G0077700(Rhsim01G0077700),Rhsim01G0230400(Rhsim01G0230400),Rhsim01G0278100(Rhsim01G0278100),Rhsim02G0012400(Rhsim02G0012400),Rhsim02G0032400(Rhsim02G0032400),Rhsim02G0063300(Rhsim02G0063300),Rhsim02G0063400(Rhsim02G0063400),Rhsim02G0063500(Rhsim02G0063500),Rhsim02G0063800(Rhsim02G0063800),Rhsim02G0063900(Rhsim02G0063900),Rhs…
MF	GO:0020037	heme binding	40	48	88	2.93353e-07	4.74104e-05	Rhsim01G0078700(Rhsim01G0078700),Rhsim01G0106800(Rhsim01G0106800),Rhsim01G0115800(Rhsim01G0115800),Rhsim01G0120400(Rhsim01G0120400),Rhsim01G0158800(Rhsim01G0158800),Rhsim01G0176800(Rhsim01G0176800),Rhsim01G0222200(Rhsim01G0222200),Rhsim01G0235500(Rhsim01G0235500),Rhsim02G0083300(Rhsim02G0083300),Rhsim03G0039000(Rhsim03G0039000),Rhsim03G0105900(Rhsim03G0105900),Rhsim03G0177800(Rhsim03G0177800),Rhs…	Rhsim01G0107200(Rhsim01G0107200),Rhsim01G0107400(Rhsim01G0107400),Rhsim01G0107600(Rhsim01G0107600),Rhsim01G0107800(Rhsim01G0107800),Rhsim01G0206400(Rhsim01G0206400),Rhsim01G0241700(Rhsim01G0241700),Rhsim01G0245300(Rhsim01G0245300),Rhsim02G0044500(Rhsim02G0044500),Rhsim02G0044700(Rhsim02G0044700),Rhsim02G0046400(Rhsim02G0046400),Rhsim03G0225300(Rhsim03G0225300),Rhsim04G0056300(Rhsim04G0056300),Rhs…
MF	GO:0046906	tetrapyrrole binding	40	48	88	4.42751e-07	6.64443e-05	Rhsim01G0078700(Rhsim01G0078700),Rhsim01G0106800(Rhsim01G0106800),Rhsim01G0115800(Rhsim01G0115800),Rhsim01G0120400(Rhsim01G0120400),Rhsim01G0158800(Rhsim01G0158800),Rhsim01G0176800(Rhsim01G0176800),Rhsim01G0222200(Rhsim01G0222200),Rhsim01G0235500(Rhsim01G0235500),Rhsim02G0083300(Rhsim02G0083300),Rhsim03G0039000(Rhsim03G0039000),Rhsim03G0105900(Rhsim03G0105900),Rhsim03G0177800(Rhsim03G0177800),Rhs…	Rhsim01G0107200(Rhsim01G0107200),Rhsim01G0107400(Rhsim01G0107400),Rhsim01G0107600(Rhsim01G0107600),Rhsim01G0107800(Rhsim01G0107800),Rhsim01G0206400(Rhsim01G0206400),Rhsim01G0241700(Rhsim01G0241700),Rhsim01G0245300(Rhsim01G0245300),Rhsim02G0044500(Rhsim02G0044500),Rhsim02G0044700(Rhsim02G0044700),Rhsim02G0046400(Rhsim02G0046400),Rhsim03G0225300(Rhsim03G0225300),Rhsim04G0056300(Rhsim04G0056300),Rhs…
MF	GO:0016772	transferase activity, transferring phosphorus-containing groups	111	164	275	9.80062e-07	0.000137274	Rhsim01G0004600(Rhsim01G0004600),Rhsim01G0036400(Rhsim01G0036400),Rhsim01G0103400(Rhsim01G0103400),Rhsim01G0110000(Rhsim01G0110000),Rhsim01G0192100(Rhsim01G0192100),Rhsim01G0214200(Rhsim01G0214200),Rhsim01G0291900(Rhsim01G0291900),Rhsim02G0053300(Rhsim02G0053300),Rhsim02G0064700(Rhsim02G0064700),Rhsim02G0071400(Rhsim02G0071400),Rhsim02G0076200(Rhsim02G0076200),Rhsim02G0077100(Rhsim02G0077100),Rhs…	Rhsim01G0003600(Rhsim01G0003600),Rhsim01G0040100(Rhsim01G0040100),Rhsim01G0040600(Rhsim01G0040600),Rhsim01G0077700(Rhsim01G0077700),Rhsim01G0220200(Rhsim01G0220200),Rhsim01G0230400(Rhsim01G0230400),Rhsim01G0278100(Rhsim01G0278100),Rhsim02G0012400(Rhsim02G0012400),Rhsim02G0032400(Rhsim02G0032400),Rhsim02G0063300(Rhsim02G0063300),Rhsim02G0063400(Rhsim02G0063400),Rhsim02G0063500(Rhsim02G0063500),Rhs…
MF	GO:0016705	oxidoreductase activity, acting on paired donors, with incorporation or reduction of molecular oxygen	39	40	79	1.73826e-06	0.000228256	Rhsim01G0078700(Rhsim01G0078700),Rhsim01G0106800(Rhsim01G0106800),Rhsim01G0115800(Rhsim01G0115800),Rhsim01G0120400(Rhsim01G0120400),Rhsim01G0158800(Rhsim01G0158800),Rhsim01G0176800(Rhsim01G0176800),Rhsim01G0222200(Rhsim01G0222200),Rhsim01G0235500(Rhsim01G0235500),Rhsim02G0083300(Rhsim02G0083300),Rhsim03G0039000(Rhsim03G0039000),Rhsim03G0105900(Rhsim03G0105900),Rhsim03G0177800(Rhsim03G0177800),Rhs…	Rhsim01G0107200(Rhsim01G0107200),Rhsim01G0107400(Rhsim01G0107400),Rhsim01G0107600(Rhsim01G0107600),Rhsim01G0107800(Rhsim01G0107800),Rhsim01G0206400(Rhsim01G0206400),Rhsim01G0245300(Rhsim01G0245300),Rhsim02G0044500(Rhsim02G0044500),Rhsim02G0044700(Rhsim02G0044700),Rhsim02G0046400(Rhsim02G0046400),Rhsim03G0225300(Rhsim03G0225300),Rhsim04G0124400(Rhsim04G0124400),Rhsim05G0048100(Rhsim05G0048100),Rhs…
BP	GO:0071554	cell wall organization or biogenesis	32	18	50	2.29207e-06	0.000283273	Rhsim01G0006600(Rhsim01G0006600),Rhsim01G0135800(Rhsim01G0135800),Rhsim01G0229000(Rhsim01G0229000),Rhsim02G0006900(Rhsim02G0006900),Rhsim02G0075400(Rhsim02G0075400),Rhsim03G0090400(Rhsim03G0090400),Rhsim03G0151800(Rhsim03G0151800),Rhsim03G0231900(Rhsim03G0231900),Rhsim04G0225300(Rhsim04G0225300),Rhsim04G0239400(Rhsim04G0239400),Rhsim05G0001600(Rhsim05G0001600),Rhsim05G0137000(Rhsim05G0137000),Rhs…	Rhsim01G0005600(Rhsim01G0005600),Rhsim01G0006400(Rhsim01G0006400),Rhsim01G0125500(Rhsim01G0125500),Rhsim01G0125600(Rhsim01G0125600),Rhsim01G0125700(Rhsim01G0125700),Rhsim06G0117300(Rhsim06G0117300),Rhsim06G0137700(Rhsim06G0137700),Rhsim07G0192900(Rhsim07G0192900),Rhsim08G0166200(Rhsim08G0166200),Rhsim09G0012100(Rhsim09G0012100),Rhsim09G0035700(Rhsim09G0035700),Rhsim09G0093000(Rhsim09G0093000),Rhs…
MF	GO:0022857	transmembrane transporter activity	104	47	151	3.33219e-06	0.00038894	Rhsim01G0001800(Rhsim01G0001800),Rhsim01G0038300(Rhsim01G0038300),Rhsim01G0073500(Rhsim01G0073500),Rhsim01G0112500(Rhsim01G0112500),Rhsim01G0144300(Rhsim01G0144300),Rhsim01G0148000(Rhsim01G0148000),Rhsim01G0186800(Rhsim01G0186800),Rhsim01G0233500(Rhsim01G0233500),Rhsim01G0233600(Rhsim01G0233600),Rhsim02G0020700(Rhsim02G0020700),Rhsim02G0030000(Rhsim02G0030000),Rhsim02G0030800(Rhsim02G0030800),Rhs…	Rhsim01G0056500(Rhsim01G0056500),Rhsim02G0138600(Rhsim02G0138600),Rhsim02G0179200(Rhsim02G0179200),Rhsim02G0232900(Rhsim02G0232900),Rhsim03G0196100(Rhsim03G0196100),Rhsim03G0249100(Rhsim03G0249100),Rhsim04G0013500(Rhsim04G0013500),Rhsim04G0100500(Rhsim04G0100500),Rhsim04G0115700(Rhsim04G0115700),Rhsim04G0174800(Rhsim04G0174800),Rhsim05G0040600(Rhsim05G0040600),Rhsim06G0019600(Rhsim06G0019600),Rhs…
MF	GO:0008515	sucrose transmembrane transporter activity	9	0	9	4.94518e-06	0.000484409	Rhsim11G0060500(Rhsim11G0060500),Rhsim11G0060600(Rhsim11G0060600),Rhsim11G0060700(Rhsim11G0060700),Rhsim11G0061200(Rhsim11G0061200),Rhsim11G0061500(Rhsim11G0061500),Rhsim11G0062600(Rhsim11G0062600),Rhsim11G0062900(Rhsim11G0062900),Rhsim11G0063000(Rhsim11G0063000),RhsimUnG0070100(RhsimUnG0070100)	-
MF	GO:0015154	disaccharide transmembrane transporter activity	9	0	9	4.94518e-06	0.000484409	Rhsim11G0060500(Rhsim11G0060500),Rhsim11G0060600(Rhsim11G0060600),Rhsim11G0060700(Rhsim11G0060700),Rhsim11G0061200(Rhsim11G0061200),Rhsim11G0061500(Rhsim11G0061500),Rhsim11G0062600(Rhsim11G0062600),Rhsim11G0062900(Rhsim11G0062900),Rhsim11G0063000(Rhsim11G0063000),RhsimUnG0070100(RhsimUnG0070100)	-
