# Supplementary material for: Transcriptomic Analysis Reveals the Regulatory Mechanism of Color Diversity in Rhododendron pulchrum Sweet (Ericaceae)
Source: Plants (Basel). 2023 Jul 15;12(14):2656. doi: 10.3390/plants12142656 (PMC10384940; doi:10.3390/plants12142656)
Supplement: Supplementary file 1 [file plants-12-02656-s001.zip › Table S4.xlsx]

## Sheet: sheet1
Table S4: Genes involved in the anthocyanin biosynthesis pathway showing genotypic difference expression
id	log2FoldChange (D/A)	log2FoldChange (C/A)	log2FoldChange (B/A)	KEGG	Description
RhsimUnG0239300	5.28527	5.18251	5.40371	K12338	UGT75C1;anthocyanidin 3-O-glucoside 5-O-glucosyltransferase
Rhsim06G0203300	2.7406	1.43796	1.41358	K17193	UGT79B1;anthocyanidin 3-O-glucoside 2'''-O-xylosyltransferase
Rhsim02G0068100	Inf	Inf	Inf	K12338	UGT75C1;anthocyanidin 3-O-glucoside 5-O-glucosyltransferase
Rhsim06G0053700	3.58807			K12939	3GT;anthocyanin 3'-O-beta-glucosyltransferase
Rhsim09G0143500	1.31005			K12937	UGAT;cyanidin-3-O-glucoside 2''-O-glucuronosyltransferase
Rhsim04G0101000	-2.3375	-1.86483	-2.72152	K12338	UGT75C1;anthocyanidin 3-O-glucoside 5-O-glucosyltransferase
Rhsim02G0068000	-2.94847	-1.50239	-3.42365	K12338	UGT75C1;anthocyanidin 3-O-glucoside 5-O-glucosyltransferase
Rhsim10G0048200	-3.62791	-3.06596	-3.82596	K12936	5AT;anthocyanin 5-aromatic acyltransferase
RhsimUnG0244800	-1.86825		-1.54043	K12338	UGT75C1;anthocyanidin 3-O-glucoside 5-O-glucosyltransferase
Rhsim02G0068600	-2.12843	-1.58107	-2.47153	K12338	UGT75C1;anthocyanidin 3-O-glucoside 5-O-glucosyltransferase
Rhsim02G0067000	-1.12343	-1.63776	-2.51664	K12338	UGT75C1;anthocyanidin 3-O-glucoside 5-O-glucosyltransferase
Rhsim10G0050200	-3.15937	-1.45844	-3.25008	K12936	5AT;anthocyanin 5-aromatic acyltransferase
Rhsim02G0066900	-2.82665			K12338	UGT75C1;anthocyanidin 3-O-glucoside 5-O-glucosyltransferase
Rhsim02G0067300	-1.39801	-2.05657	-1.58697	K12338	UGT75C1;anthocyanidin 3-O-glucoside 5-O-glucosyltransferase
Rhsim09G0143900	-1.03387	-1.89039	-1.60624	K12937	UGAT;cyanidin-3-O-glucoside 2''-O-glucuronosyltransferase
Rhsim10G0048100	-Inf			K12936	5AT;anthocyanin 5-aromatic acyltransferase
Rhsim02G0067600	-1.35477	-1.36402		K12338	UGT75C1;anthocyanidin 3-O-glucoside 5-O-glucosyltransferase
Rhsim04G0113400		2.15953	1.69832	K12937	UGAT;cyanidin-3-O-glucoside 2''-O-glucuronosyltransferase
Rhsim04G0062600		1.25513		K12931	3MaT1;anthocyanin 3-O-glucoside-6''-O-malonyltransferase
Rhsim03G0195200		-2.07418		K12938	GT1;anthocyanidin 5,3-O-glucosyltransferase
Rhsim08G0056000		-3.08089		K12938	GT1;anthocyanidin 5,3-O-glucosyltransferase
Rhsim11G0163600		-1.17057	-1.57075	K12939	3GT;anthocyanin 3'-O-beta-glucosyltransferase
Rhsim03G0193600		-1.4865	-1.72256	K12938	GT1;anthocyanidin 5,3-O-glucosyltransferase
Rhsim09G0143600		-Inf	-Inf	K12937	UGAT;cyanidin-3-O-glucoside 2''-O-glucuronosyltransferase
RhsimUnG0224100			1.28101	K12938	GT1;anthocyanidin 5,3-O-glucosyltransferase
Rhsim08G0056300			1.18653	K12938	GT1;anthocyanidin 5,3-O-glucosyltransferase
Rhsim10G0050900			2.24947	K12931	3MaT1;anthocyanin 3-O-glucoside-6''-O-malonyltransferase
Rhsim13G0046300			-1.19524	K12338	UGT75C1;anthocyanidin 3-O-glucoside 5-O-glucosyltransferase
Rhsim10G0173800			-1.42767	K12938	GT1;anthocyanidin 5,3-O-glucosyltransferase
Rhsim11G0161800			-2.65963	K12939	3GT;anthocyanin 3'-O-beta-glucosyltransferase
Note: Blank presented in the table indicates that there is no significant difference in gene expression.
