# Supplementary material for: Transcriptomic Analysis Reveals the Regulatory Mechanism of Color Diversity in Rhododendron pulchrum Sweet (Ericaceae)
Source: Plants (Basel). 2023 Jul 15;12(14):2656. doi: 10.3390/plants12142656 (PMC10384940; doi:10.3390/plants12142656)
Supplement: Supplementary file 1 [file plants-12-02656-s001.zip › Table S5.xlsx]

## Sheet: Total TFs
Table S5: List of differentially expressed TFs identified in the three pairwise comparisons
id	Symbol	Family
Rhsim02G0247900	Rhsim02G0247900	ARF
Rhsim02G0248200	Rhsim02G0248200	ARF
Rhsim06G0023400	Rhsim06G0023400	ARF
Rhsim12G0086600	Rhsim12G0086600	ARR-B
Rhsim01G0258000	Rhsim01G0258000	B3
Rhsim07G0229600	Rhsim07G0229600	B3
Rhsim11G0166600	Rhsim11G0166600	B3
Rhsim11G0166700	Rhsim11G0166700	B3
Rhsim11G0170400	Rhsim11G0170400	B3
RhsimUnG0258800	RhsimUnG0258800	B3
Rhsim01G0258300	Rhsim01G0258300	bHLH
Rhsim02G0032900	Rhsim02G0032900	bHLH
Rhsim02G0084200	Rhsim02G0084200	bHLH
Rhsim03G0173700	Rhsim03G0173700	bHLH
Rhsim03G0231600	Rhsim03G0231600	bHLH
Rhsim03G0267300	Rhsim03G0267300	bHLH
Rhsim04G0057500	Rhsim04G0057500	bHLH
Rhsim05G0017500	Rhsim05G0017500	bHLH
Rhsim05G0094500	Rhsim05G0094500	bHLH
Rhsim06G0052600	Rhsim06G0052600	bHLH
Rhsim06G0069000	Rhsim06G0069000	bHLH
Rhsim06G0190900	Rhsim06G0190900	bHLH
Rhsim07G0015600	Rhsim07G0015600	bHLH
Rhsim07G0032300	Rhsim07G0032300	bHLH
Rhsim07G0044100	Rhsim07G0044100	bHLH
Rhsim07G0079500	Rhsim07G0079500	bHLH
Rhsim08G0068400	Rhsim08G0068400	bHLH
Rhsim08G0230000	Rhsim08G0230000	bHLH
Rhsim09G0106500	Rhsim09G0106500	bHLH
Rhsim10G0040900	Rhsim10G0040900	bHLH
Rhsim11G0145400	Rhsim11G0145400	bHLH
Rhsim12G0163800	Rhsim12G0163800	bHLH
Rhsim13G0050900	Rhsim13G0050900	bHLH
RhsimUnG0214100	RhsimUnG0214100	bHLH
Rhsim01G0242900	Rhsim01G0242900	bZIP
Rhsim04G0234800	Rhsim04G0234800	bZIP
Rhsim06G0135000	Rhsim06G0135000	bZIP
Rhsim07G0199000	Rhsim07G0199000	bZIP
Rhsim07G0228100	Rhsim07G0228100	bZIP
Rhsim09G0118000	Rhsim09G0118000	bZIP
Rhsim10G0154600	Rhsim10G0154600	bZIP
Rhsim11G0132800	Rhsim11G0132800	bZIP
Rhsim11G0165000	Rhsim11G0165000	bZIP
Rhsim11G0179700	Rhsim11G0179700	bZIP
Rhsim13G0111100	Rhsim13G0111100	bZIP
RhsimUnG0219100	RhsimUnG0219100	bZIP
Rhsim01G0006300	Rhsim01G0006300	C2H2
Rhsim01G0135400	Rhsim01G0135400	C2H2
Rhsim01G0135500	Rhsim01G0135500	C2H2
Rhsim03G0112400	Rhsim03G0112400	C2H2
Rhsim03G0264000	Rhsim03G0264000	C2H2
Rhsim07G0049000	Rhsim07G0049000	C2H2
Rhsim08G0207600	Rhsim08G0207600	C2H2
Rhsim09G0146000	Rhsim09G0146000	C2H2
Rhsim09G0163800	Rhsim09G0163800	C2H2
Rhsim11G0043600	Rhsim11G0043600	C2H2
Rhsim13G0223500	Rhsim13G0223500	C2H2
RhsimUnG0176700	RhsimUnG0176700	C2H2
Rhsim03G0016200	Rhsim03G0016200	C3H
Rhsim03G0017700	Rhsim03G0017700	C3H
Rhsim03G0235400	Rhsim03G0235400	C3H
Rhsim05G0029500	Rhsim05G0029500	C3H
Rhsim08G0216100	Rhsim08G0216100	C3H
Rhsim09G0177600	Rhsim09G0177600	C3H
Rhsim11G0134600	Rhsim11G0134600	C3H
Rhsim13G0068400	Rhsim13G0068400	C3H
Rhsim06G0157800	Rhsim06G0157800	CO-like
Rhsim12G0084500	Rhsim12G0084500	CO-like
Rhsim08G0223800	Rhsim08G0223800	CPP
Rhsim02G0142700	Rhsim02G0142700	Dof
Rhsim06G0041000	Rhsim06G0041000	Dof
Rhsim08G0104800	Rhsim08G0104800	Dof
Rhsim08G0231700	Rhsim08G0231700	Dof
Rhsim10G0038600	Rhsim10G0038600	Dof
Rhsim13G0189900	Rhsim13G0189900	Dof
RhsimUnG0043700	RhsimUnG0043700	Dof
RhsimUnG0070700	RhsimUnG0070700	Dof
Rhsim05G0191200	Rhsim05G0191200	E2F/DP
Rhsim01G0207300	Rhsim01G0207300	ERF
Rhsim01G0243900	Rhsim01G0243900	ERF
Rhsim01G0264600	Rhsim01G0264600	ERF
Rhsim02G0036200	Rhsim02G0036200	ERF
Rhsim02G0040100	Rhsim02G0040100	ERF
Rhsim02G0040200	Rhsim02G0040200	ERF
Rhsim02G0153400	Rhsim02G0153400	ERF
Rhsim02G0178800	Rhsim02G0178800	ERF
Rhsim03G0161100	Rhsim03G0161100	ERF
Rhsim03G0176600	Rhsim03G0176600	ERF
Rhsim03G0226400	Rhsim03G0226400	ERF
Rhsim03G0248300	Rhsim03G0248300	ERF
Rhsim04G0150600	Rhsim04G0150600	ERF
Rhsim04G0184600	Rhsim04G0184600	ERF
Rhsim05G0004400	Rhsim05G0004400	ERF
Rhsim05G0041500	Rhsim05G0041500	ERF
Rhsim05G0084300	Rhsim05G0084300	ERF
Rhsim06G0027500	Rhsim06G0027500	ERF
Rhsim06G0105000	Rhsim06G0105000	ERF
Rhsim06G0147200	Rhsim06G0147200	ERF
Rhsim07G0003300	Rhsim07G0003300	ERF
Rhsim07G0007100	Rhsim07G0007100	ERF
Rhsim07G0072500	Rhsim07G0072500	ERF
Rhsim07G0085000	Rhsim07G0085000	ERF
Rhsim07G0094800	Rhsim07G0094800	ERF
Rhsim07G0115900	Rhsim07G0115900	ERF
Rhsim07G0116600	Rhsim07G0116600	ERF
Rhsim07G0116700	Rhsim07G0116700	ERF
Rhsim07G0188600	Rhsim07G0188600	ERF
Rhsim08G0004400	Rhsim08G0004400	ERF
Rhsim08G0214100	Rhsim08G0214100	ERF
Rhsim09G0189600	Rhsim09G0189600	ERF
Rhsim09G0189800	Rhsim09G0189800	ERF
Rhsim09G0189900	Rhsim09G0189900	ERF
Rhsim09G0203500	Rhsim09G0203500	ERF
Rhsim10G0144900	Rhsim10G0144900	ERF
Rhsim11G0086800	Rhsim11G0086800	ERF
Rhsim12G0101300	Rhsim12G0101300	ERF
Rhsim12G0192100	Rhsim12G0192100	ERF
Rhsim13G0034200	Rhsim13G0034200	ERF
Rhsim13G0058400	Rhsim13G0058400	ERF
RhsimUnG0094400	RhsimUnG0094400	ERF
Rhsim02G0114200	Rhsim02G0114200	FAR1
Rhsim04G0161500	Rhsim04G0161500	FAR1
Rhsim05G0110700	Rhsim05G0110700	FAR1
Rhsim05G0121500	Rhsim05G0121500	FAR1
Rhsim05G0159900	Rhsim05G0159900	FAR1
Rhsim06G0231600	Rhsim06G0231600	FAR1
Rhsim07G0159000	Rhsim07G0159000	FAR1
Rhsim08G0142800	Rhsim08G0142800	FAR1
Rhsim08G0146600	Rhsim08G0146600	FAR1
Rhsim10G0159200	Rhsim10G0159200	FAR1
Rhsim10G0168700	Rhsim10G0168700	FAR1
RhsimUnG0033900	RhsimUnG0033900	FAR1
RhsimUnG0161100	RhsimUnG0161100	FAR1
RhsimUnG0212200	RhsimUnG0212200	FAR1
RhsimUnG0247000	RhsimUnG0247000	FAR1
Rhsim01G0239300	Rhsim01G0239300	G2-like
Rhsim04G0086400	Rhsim04G0086400	G2-like
Rhsim06G0244400	Rhsim06G0244400	G2-like
Rhsim07G0021200	Rhsim07G0021200	G2-like
Rhsim07G0107600	Rhsim07G0107600	G2-like
Rhsim09G0055800	Rhsim09G0055800	G2-like
Rhsim11G0169200	Rhsim11G0169200	G2-like
Rhsim01G0135800	Rhsim01G0135800	GATA
Rhsim02G0006100	Rhsim02G0006100	GATA
Rhsim02G0176800	Rhsim02G0176800	GATA
Rhsim03G0119800	Rhsim03G0119800	GATA
Rhsim07G0146600	Rhsim07G0146600	GATA
Rhsim11G0032500	Rhsim11G0032500	GeBP
Rhsim01G0291300	Rhsim01G0291300	GRAS
Rhsim08G0193400	Rhsim08G0193400	GRAS
Rhsim10G0178900	Rhsim10G0178900	GRAS
Rhsim13G0080500	Rhsim13G0080500	GRAS
Rhsim06G0064700	Rhsim06G0064700	GRF
Rhsim02G0195700	Rhsim02G0195700	HB-other
Rhsim10G0023000	Rhsim10G0023000	HD-ZIP
Rhsim01G0177300	Rhsim01G0177300	HD-ZIP
Rhsim09G0208900	Rhsim09G0208900	HD-ZIP
Rhsim07G0077900	Rhsim07G0077900	HD-ZIP
Rhsim08G0124300	Rhsim08G0124300	HD-ZIP
Rhsim01G0272100	Rhsim01G0272100	HSF
Rhsim10G0118300	Rhsim10G0118300	HSF
Rhsim13G0177200	Rhsim13G0177200	HSF
Rhsim01G0220700	Rhsim01G0220700	LBD
Rhsim08G0104000	Rhsim08G0104000	LBD
Rhsim08G0176000	Rhsim08G0176000	LBD
Rhsim08G0234200	Rhsim08G0234200	LBD
Rhsim10G0121800	Rhsim10G0121800	LBD
Rhsim12G0084700	Rhsim12G0084700	LBD
Rhsim12G0143300	Rhsim12G0143300	LBD
Rhsim12G0159700	Rhsim12G0159700	LBD
Rhsim12G0206300	Rhsim12G0206300	LBD
Rhsim13G0056700	Rhsim13G0056700	LBD
Rhsim13G0061300	Rhsim13G0061300	LBD
Rhsim13G0091900	Rhsim13G0091900	LBD
Rhsim06G0119100	Rhsim06G0119100	MIKC_MADS
Rhsim07G0211700	Rhsim07G0211700	MIKC_MADS
Rhsim11G0144300	Rhsim11G0144300	MIKC_MADS
Rhsim12G0176200	Rhsim12G0176200	MIKC_MADS
RhsimUnG0064200	RhsimUnG0064200	MIKC_MADS
Rhsim08G0008600	Rhsim08G0008600	M-type_MADS
Rhsim09G0012400	Rhsim09G0012400	M-type_MADS
Rhsim10G0156700	Rhsim10G0156700	M-type_MADS
Rhsim12G0086800	Rhsim12G0086800	M-type_MADS
RhsimUnG0135000	RhsimUnG0135000	M-type_MADS
Rhsim01G0235000	Rhsim01G0235000	MYB
Rhsim01G0264200	Rhsim01G0264200	MYB
Rhsim02G0001800	Rhsim02G0001800	MYB
Rhsim02G0119000	Rhsim02G0119000	MYB
Rhsim03G0045800	Rhsim03G0045800	MYB
Rhsim03G0090900	Rhsim03G0090900	MYB
Rhsim03G0180500	Rhsim03G0180500	MYB
Rhsim03G0229400	Rhsim03G0229400	MYB
Rhsim04G0061700	Rhsim04G0061700	MYB
Rhsim04G0242900	Rhsim04G0242900	MYB
Rhsim06G0046000	Rhsim06G0046000	MYB
Rhsim06G0153700	Rhsim06G0153700	MYB
Rhsim06G0153800	Rhsim06G0153800	MYB
Rhsim06G0163100	Rhsim06G0163100	MYB
Rhsim07G0019400	Rhsim07G0019400	MYB
Rhsim07G0102900	Rhsim07G0102900	MYB
Rhsim08G0087300	Rhsim08G0087300	MYB
Rhsim08G0136700	Rhsim08G0136700	MYB
Rhsim09G0042000	Rhsim09G0042000	MYB
Rhsim09G0106400	Rhsim09G0106400	MYB
Rhsim09G0172100	Rhsim09G0172100	MYB
Rhsim10G0036000	Rhsim10G0036000	MYB
Rhsim10G0056300	Rhsim10G0056300	MYB
Rhsim10G0112500	Rhsim10G0112500	MYB
Rhsim10G0187000	Rhsim10G0187000	MYB
Rhsim12G0156400	Rhsim12G0156400	MYB
Rhsim12G0164500	Rhsim12G0164500	MYB
Rhsim13G0034600	Rhsim13G0034600	MYB
Rhsim13G0099300	Rhsim13G0099300	MYB
Rhsim01G0132800	Rhsim01G0132800	MYB_related
Rhsim01G0214800	Rhsim01G0214800	MYB_related
Rhsim01G0229600	Rhsim01G0229600	MYB_related
Rhsim01G0289600	Rhsim01G0289600	MYB_related
Rhsim03G0160200	Rhsim03G0160200	MYB_related
Rhsim05G0022500	Rhsim05G0022500	MYB_related
Rhsim05G0073900	Rhsim05G0073900	MYB_related
Rhsim05G0088000	Rhsim05G0088000	MYB_related
Rhsim06G0032200	Rhsim06G0032200	MYB_related
Rhsim07G0002700	Rhsim07G0002700	MYB_related
Rhsim07G0019500	Rhsim07G0019500	MYB_related
Rhsim07G0019600	Rhsim07G0019600	MYB_related
Rhsim08G0087600	Rhsim08G0087600	MYB_related
Rhsim08G0238400	Rhsim08G0238400	MYB_related
Rhsim11G0177900	Rhsim11G0177900	MYB_related
Rhsim11G0178400	Rhsim11G0178400	MYB_related
Rhsim02G0069700	Rhsim02G0069700	NAC
Rhsim05G0111300	Rhsim05G0111300	NAC
Rhsim06G0239700	Rhsim06G0239700	NAC
Rhsim08G0040700	Rhsim08G0040700	NAC
Rhsim08G0194300	Rhsim08G0194300	NAC
Rhsim10G0003400	Rhsim10G0003400	NAC
Rhsim10G0036100	Rhsim10G0036100	NAC
Rhsim11G0012800	Rhsim11G0012800	NAC
Rhsim12G0065300	Rhsim12G0065300	NAC
Rhsim12G0096900	Rhsim12G0096900	NAC
Rhsim12G0175300	Rhsim12G0175300	NAC
Rhsim13G0035900	Rhsim13G0035900	NAC
Rhsim13G0113000	Rhsim13G0113000	NAC
RhsimUnG0091600	RhsimUnG0091600	NAC
Rhsim03G0063600	Rhsim03G0063600	NF-YA
Rhsim08G0237000	Rhsim08G0237000	NF-YA
Rhsim10G0013500	Rhsim10G0013500	NF-YB
Rhsim10G0132000	Rhsim10G0132000	NF-YB
Rhsim02G0225800	Rhsim02G0225800	NF-YC
Rhsim05G0210500	Rhsim05G0210500	NF-YC
RhsimUnG0136700	RhsimUnG0136700	RAV
Rhsim04G0027400	Rhsim04G0027400	SAP
Rhsim03G0008900	Rhsim03G0008900	SBP
Rhsim04G0070000	Rhsim04G0070000	SBP
Rhsim07G0032800	Rhsim07G0032800	SBP
Rhsim07G0032900	Rhsim07G0032900	SBP
Rhsim12G0094100	Rhsim12G0094100	SBP
Rhsim12G0149900	Rhsim12G0149900	SBP
RhsimUnG0060100	RhsimUnG0060100	STAT
Rhsim04G0130400	Rhsim04G0130400	TALE
Rhsim11G0044800	Rhsim11G0044800	TALE
Rhsim12G0113400	Rhsim12G0113400	TALE
Rhsim02G0139200	Rhsim02G0139200	TCP
Rhsim03G0093000	Rhsim03G0093000	TCP
Rhsim06G0095300	Rhsim06G0095300	TCP
Rhsim06G0133700	Rhsim06G0133700	TCP
Rhsim07G0022500	Rhsim07G0022500	TCP
Rhsim08G0156400	Rhsim08G0156400	TCP
Rhsim10G0063600	Rhsim10G0063600	TCP
Rhsim10G0063800	Rhsim10G0063800	TCP
Rhsim11G0125700	Rhsim11G0125700	TCP
Rhsim12G0023400	Rhsim12G0023400	TCP
Rhsim12G0148800	Rhsim12G0148800	TCP
Rhsim03G0080600	Rhsim03G0080600	Trihelix
Rhsim03G0174100	Rhsim03G0174100	Trihelix
Rhsim04G0136700	Rhsim04G0136700	Trihelix
Rhsim05G0216700	Rhsim05G0216700	Trihelix
Rhsim06G0131000	Rhsim06G0131000	Trihelix
RhsimUnG0101800	RhsimUnG0101800	Trihelix
Rhsim01G0241100	Rhsim01G0241100	WRKY
Rhsim02G0213700	Rhsim02G0213700	WRKY
Rhsim03G0198800	Rhsim03G0198800	WRKY
Rhsim05G0168200	Rhsim05G0168200	WRKY
Rhsim05G0231400	Rhsim05G0231400	WRKY
Rhsim05G0231500	Rhsim05G0231500	WRKY
Rhsim06G0164400	Rhsim06G0164400	WRKY
Rhsim06G0226600	Rhsim06G0226600	WRKY
Rhsim06G0235700	Rhsim06G0235700	WRKY
Rhsim07G0010600	Rhsim07G0010600	WRKY
Rhsim07G0083100	Rhsim07G0083100	WRKY
Rhsim08G0098300	Rhsim08G0098300	WRKY
Rhsim08G0158800	Rhsim08G0158800	WRKY
Rhsim08G0205900	Rhsim08G0205900	WRKY
Rhsim10G0148600	Rhsim10G0148600	WRKY
Rhsim10G0148800	Rhsim10G0148800	WRKY
Rhsim12G0094500	Rhsim12G0094500	WRKY
Rhsim13G0004700	Rhsim13G0004700	WRKY
Rhsim13G0061600	Rhsim13G0061600	WRKY
Rhsim13G0151900	Rhsim13G0151900	WRKY
Rhsim06G0032400	Rhsim06G0032400	ZF-HD
Rhsim08G0118200	Rhsim08G0118200	ZF-HD
Rhsim09G0085300	Rhsim09G0085300	ZF-HD
Rhsim11G0117600	Rhsim11G0117600	ZF-HD

## Sheet: D vs. A
id	foldChange(D/A)	log2FoldChange	Family
Rhsim06G0023400	0.35847	-1.48008	ARF
Rhsim12G0086600	2.69603	1.43083	ARR-B
Rhsim01G0258000	Inf	Inf	B3
Rhsim11G0166700	2.87663	1.52438	B3
Rhsim01G0258300	0.341829	-1.54865	bHLH
Rhsim02G0084200	2.05345	1.03805	bHLH
Rhsim03G0173700	8.36353	3.06411	bHLH
Rhsim03G0231600	4.20906	2.0735	bHLH
Rhsim03G0267300	2.36936	1.2445	bHLH
Rhsim05G0017500	2.45156	1.2937	bHLH
Rhsim05G0094500	2.10252	1.07212	bHLH
Rhsim07G0044100	4.49728	2.16905	bHLH
Rhsim08G0068400	3.42105	1.77444	bHLH
Rhsim08G0230000	0.450548	-1.15025	bHLH
Rhsim09G0106500	36.1953	5.17773	bHLH
Rhsim11G0145400	0.456635	-1.13089	bHLH
Rhsim01G0242900	4.70175	2.2332	bZIP
Rhsim07G0228100	2.12604	1.08817	bZIP
Rhsim09G0118000	Inf	Inf	bZIP
Rhsim10G0154600	0.172029	-2.53928	bZIP
Rhsim11G0132800	2.25818	1.17516	bZIP
Rhsim11G0179700	0.463469	-1.10945	bZIP
RhsimUnG0219100	0.289416	-1.78878	bZIP
Rhsim01G0006300	0.254389	-1.97489	C2H2
Rhsim01G0135400	15.1784	3.92395	C2H2
Rhsim01G0135500	7.71748	2.94813	C2H2
Rhsim03G0264000	0.146111	-2.77486	C2H2
Rhsim07G0049000	9.55177	3.25577	C2H2
Rhsim08G0207600	3.59789	1.84715	C2H2
Rhsim09G0146000	2.65213	1.40715	C2H2
RhsimUnG0176700	0.261384	-1.93576	C2H2
Rhsim03G0016200	3.87728	1.95505	C3H
Rhsim03G0017700	3.05468	1.61102	C3H
Rhsim08G0216100	2.95537	1.56334	C3H
Rhsim09G0177600	0.490775	-1.02687	C3H
Rhsim06G0157800	2.33963	1.22628	CO-like
Rhsim12G0084500	0.235173	-2.08821	CO-like
Rhsim08G0223800	45.8279	5.51815	CPP
Rhsim02G0142700	2.04775	1.03404	Dof
Rhsim06G0041000	0.439351	-1.18655	Dof
Rhsim08G0104800	3.46879	1.79443	Dof
Rhsim10G0038600	2.45385	1.29504	Dof
Rhsim13G0189900	3.51141	1.81205	Dof
RhsimUnG0043700	2.41103	1.26965	Dof
Rhsim01G0243900	0.356139	-1.48949	ERF
Rhsim01G0264600	3.13978	1.65066	ERF
Rhsim02G0036200	0.416856	-1.26238	ERF
Rhsim02G0040100	55.199	5.78657	ERF
Rhsim02G0040200	2.03052	1.02185	ERF
Rhsim02G0178800	3.91104	1.96755	ERF
Rhsim03G0161100	0.403452	-1.30953	ERF
Rhsim03G0176600	2.39421	1.25955	ERF
Rhsim03G0226400	0.178062	-2.48955	ERF
Rhsim04G0150600	0.440719	-1.18207	ERF
Rhsim05G0041500	2.18951	1.13061	ERF
Rhsim07G0003300	15.7068	3.97332	ERF
Rhsim07G0072500	40.7297	5.34801	ERF
Rhsim07G0085000	0.487957	-1.03518	ERF
Rhsim07G0115900	0.477409	-1.0667	ERF
Rhsim07G0116600	0.352443	-1.50454	ERF
Rhsim08G0004400	6.14143	2.61857	ERF
Rhsim08G0214100	7.63997	2.93357	ERF
Rhsim10G0144900	3.57016	1.83599	ERF
Rhsim11G0086800	2.23988	1.16342	ERF
Rhsim12G0101300	0.415286	-1.26782	ERF
Rhsim12G0192100	2.31012	1.20797	ERF
Rhsim13G0058400	0.491758	-1.02398	ERF
RhsimUnG0094400	0.493836	-1.0179	ERF
Rhsim02G0114200	0.201598	-2.31045	FAR1
Rhsim05G0159900	0.0168517	-5.89096	FAR1
Rhsim07G0159000	29.5284	4.88403	FAR1
Rhsim08G0146600	0.172743	-2.5333	FAR1
RhsimUnG0033900	0.439989	-1.18446	FAR1
Rhsim07G0021200	0.0585558	-4.09404	G2-like
Rhsim07G0107600	2.09798	1.069	G2-like
Rhsim11G0169200	0.413807	-1.27297	G2-like
Rhsim02G0006100	0.470297	-1.08836	GATA
Rhsim02G0176800	Inf	Inf	GATA
Rhsim03G0119800	3.89983	1.96341	GATA
Rhsim10G0178900	2.82248	1.49696	GRAS
Rhsim13G0080500	2.66728	1.41537	GRAS
Rhsim10G0023000	0.473198	-1.07949	HD-ZIP
Rhsim01G0272100	11.1898	3.48412	HSF
Rhsim13G0177200	4.58463	2.19681	HSF
Rhsim01G0220700	2.04607	1.03285	LBD
Rhsim08G0104000	2.99656	1.58331	LBD
Rhsim08G0234200	5.0968	2.34959	LBD
Rhsim10G0121800	6.9413	2.79521	LBD
Rhsim12G0084700	8.68151	3.11795	LBD
Rhsim12G0143300	0.41821	-1.2577	LBD
Rhsim12G0206300	5.59229	2.48344	LBD
Rhsim13G0056700	0.40105	-1.31815	LBD
Rhsim13G0091900	0.428072	-1.22408	LBD
Rhsim07G0211700	2.79635	1.48355	MIKC_MADS
RhsimUnG0064200	4.441	2.15088	MIKC_MADS
Rhsim08G0008600	8.6872	3.11889	M-type_MADS
Rhsim09G0012400	4.99895	2.32162	M-type_MADS
Rhsim10G0156700	0.0908807	-3.45988	M-type_MADS
Rhsim12G0086800	2.65509	1.40876	M-type_MADS
RhsimUnG0135000	12.4901	3.64271	M-type_MADS
Rhsim02G0119000	0.29646	-1.75409	MYB
Rhsim03G0180500	5.07223	2.34262	MYB
Rhsim03G0229400	0.477937	-1.06511	MYB
Rhsim04G0061700	8.74518	3.12849	MYB
Rhsim04G0242900	2.21147	1.14501	MYB
Rhsim06G0046000	2.40988	1.26896	MYB
Rhsim06G0153700	0.183045	-2.44973	MYB
Rhsim06G0153800	0.0570192	-4.13241	MYB
Rhsim06G0163100	6.52053	2.70499	MYB
Rhsim07G0019400	Inf	Inf	MYB
Rhsim09G0042000	2.59244	1.37431	MYB
Rhsim10G0036000	2.15659	1.10875	MYB
Rhsim10G0187000	0.421612	-1.24601	MYB
Rhsim12G0156400	2.97325	1.57204	MYB
Rhsim13G0034600	3.49644	1.80589	MYB
Rhsim01G0132800	0.403523	-1.30928	MYB_related
Rhsim01G0214800	2.54418	1.3472	MYB_related
Rhsim01G0289600	2.86458	1.51832	MYB_related
Rhsim03G0160200	6.28842	2.6527	MYB_related
Rhsim05G0073900	3.00829	1.58895	MYB_related
Rhsim05G0088000	0.495988	-1.01162	MYB_related
Rhsim07G0002700	2.52505	1.33631	MYB_related
Rhsim08G0238400	0.401325	-1.31716	MYB_related
Rhsim11G0178400	21.6838	4.43855	MYB_related
Rhsim05G0111300	4.26421	2.09228	NAC
Rhsim08G0194300	3.14819	1.65452	NAC
Rhsim10G0003400	2.77134	1.47058	NAC
Rhsim11G0012800	2.10305	1.07248	NAC
RhsimUnG0091600	4.64351	2.21522	NAC
Rhsim10G0132000	7.67747	2.94063	NF-YB
Rhsim02G0225800	0	-Inf	NF-YC
Rhsim05G0210500	7.98774	2.99779	NF-YC
RhsimUnG0136700	0.388505	-1.36399	RAV
Rhsim04G0027400	7.27335	2.86262	SAP
Rhsim07G0032800	0.374953	-1.41522	SBP
Rhsim12G0094100	2.37977	1.25082	SBP
RhsimUnG0060100	2.04029	1.02877	STAT
Rhsim04G0130400	0.0964039	-3.37476	TALE
Rhsim03G0093000	0.467972	-1.09551	TCP
Rhsim06G0095300	0.480167	-1.05839	TCP
Rhsim07G0022500	0.368761	-1.43924	TCP
Rhsim08G0156400	0.480678	-1.05686	TCP
Rhsim10G0063600	3.19418	1.67544	TCP
Rhsim12G0148800	3.49434	1.80502	TCP
Rhsim03G0080600	0.462187	-1.11345	Trihelix
Rhsim03G0174100	79.1313	6.30618	Trihelix
Rhsim04G0136700	0.466133	-1.10119	Trihelix
Rhsim05G0216700	2.32664	1.21825	Trihelix
Rhsim06G0131000	2.06473	1.04595	Trihelix
RhsimUnG0101800	0.241455	-2.05017	Trihelix
Rhsim01G0241100	0.494714	-1.01533	WRKY
Rhsim02G0213700	2.83222	1.50193	WRKY
Rhsim05G0168200	4.05459	2.01956	WRKY
Rhsim06G0235700	0.429706	-1.21858	WRKY
Rhsim07G0010600	2.08303	1.05869	WRKY
Rhsim07G0083100	0.412299	-1.27824	WRKY
Rhsim10G0148600	2.45105	1.2934	WRKY
Rhsim10G0148800	3.97207	1.98989	WRKY
Rhsim13G0061600	0.15153	-2.72232	WRKY
Rhsim08G0118200	0.368233	-1.44131	ZF-HD
Rhsim09G0085300	10.9839	3.45732	ZF-HD
Rhsim11G0117600	0.32017	-1.64309	ZF-HD

## Sheet: C vs.  A 
id	foldChange(C/A)	log2FoldChange	Family
Rhsim02G0247900	3.94583	1.98033	ARF
Rhsim02G0248200	2.1306	1.09126	ARF
Rhsim12G0086600	2.67715	1.4207	ARR-B
Rhsim11G0166700	2.50508	1.32486	B3
Rhsim03G0173700	3.6058	1.85032	bHLH
Rhsim03G0267300	3.447	1.78534	bHLH
Rhsim04G0057500	2.02004	1.01438	bHLH
Rhsim05G0017500	2.42574	1.27843	bHLH
Rhsim06G0052600	0.340477	-1.55437	bHLH
Rhsim07G0079500	2.42586	1.27849	bHLH
Rhsim08G0068400	0.480469	-1.05749	bHLH
Rhsim08G0230000	0.207299	-2.27022	bHLH
Rhsim09G0106500	59.5257	5.89544	bHLH
Rhsim12G0163800	4.48208	2.16417	bHLH
RhsimUnG0214100	4.58091	2.19563	bHLH
Rhsim07G0199000	2.38261	1.25254	bZIP
Rhsim07G0228100	2.4841	1.31272	bZIP
Rhsim09G0118000	Inf	Inf	bZIP
Rhsim01G0006300	0.466204	-1.10097	C2H2
Rhsim01G0135500	3.24214	1.69694	C2H2
Rhsim03G0112400	0.424145	-1.23737	C2H2
Rhsim07G0049000	3.28488	1.71584	C2H2
Rhsim09G0163800	0.238383	-2.06864	C2H2
Rhsim11G0043600	0.449822	-1.15257	C2H2
Rhsim13G0223500	2.86545	1.51876	C2H2
RhsimUnG0176700	0.293726	-1.76746	C2H2
Rhsim03G0016200	3.69937	1.88728	C3H
Rhsim03G0017700	3.35131	1.74472	C3H
Rhsim06G0157800	2.56311	1.3579	CO-like
Rhsim08G0223800	51.8063	5.69506	CPP
Rhsim06G0041000	0.439176	-1.18713	Dof
Rhsim08G0104800	5.64601	2.49723	Dof
Rhsim08G0231700	2.60179	1.3795	Dof
Rhsim13G0189900	3.59587	1.84634	Dof
RhsimUnG0043700	2.23224	1.15849	Dof
RhsimUnG0070700	3.41392	1.77143	Dof
Rhsim05G0191200	0.496052	-1.01144	E2F/DP
Rhsim01G0243900	0.475027	-1.07392	ERF
Rhsim01G0264600	10.3328	3.36916	ERF
Rhsim02G0036200	0.361133	-1.4694	ERF
Rhsim02G0040100	68.6319	6.10081	ERF
Rhsim02G0153400	0.261666	-1.9342	ERF
Rhsim03G0176600	2.48885	1.31548	ERF
Rhsim03G0226400	0.139504	-2.84162	ERF
Rhsim03G0248300	0.483951	-1.04707	ERF
Rhsim04G0184600	0.41621	-1.26462	ERF
Rhsim06G0027500	Inf	Inf	ERF
Rhsim06G0105000	0.0802838	-3.63875	ERF
Rhsim07G0007100	2.21949	1.15023	ERF
Rhsim07G0072500	49.1438	5.61894	ERF
Rhsim07G0094800	2.21194	1.14532	ERF
Rhsim08G0214100	4.17612	2.06216	ERF
Rhsim09G0189600	2.56544	1.35921	ERF
Rhsim09G0203500	0.313021	-1.67567	ERF
Rhsim10G0144900	3.06186	1.61441	ERF
Rhsim12G0192100	11.7854	3.55893	ERF
RhsimUnG0094400	0.429588	-1.21897	ERF
Rhsim02G0114200	0.34755	-1.52471	FAR1
Rhsim05G0121500	0.352197	-1.50555	FAR1
Rhsim05G0159900	0.0190469	-5.7143	FAR1
Rhsim06G0231600	2.53226	1.34043	FAR1
Rhsim08G0146600	0.293536	-1.76839	FAR1
Rhsim10G0159200	2.82589	1.49871	FAR1
Rhsim10G0168700	0.182475	-2.45423	FAR1
Rhsim01G0239300	0.132099	-2.92031	G2-like
Rhsim04G0086400	2.31507	1.21105	G2-like
Rhsim06G0244400	2.32812	1.21917	G2-like
Rhsim07G0021200	0.0865272	-3.5307	G2-like
Rhsim09G0055800	0.34498	-1.53541	G2-like
Rhsim01G0135800	2.13292	1.09283	GATA
Rhsim02G0176800	Inf	Inf	GATA
Rhsim10G0178900	4.49029	2.16681	GRAS
Rhsim13G0080500	2.46193	1.29979	GRAS
Rhsim06G0064700	3.97148	1.98968	GRF
Rhsim02G0195700	0.258902	-1.94952	HB-other
Rhsim01G0177300	2.89955	1.53583	HD-ZIP
Rhsim08G0176000	2.7481	1.45844	LBD
Rhsim08G0234200	2.58881	1.37229	LBD
Rhsim10G0121800	3.75864	1.91021	LBD
Rhsim12G0206300	2.90503	1.53855	LBD
Rhsim13G0061300	0.290492	-1.78343	LBD
Rhsim13G0091900	0.37865	-1.40106	LBD
Rhsim06G0119100	2.89252	1.53233	MIKC_MADS
Rhsim07G0211700	3.85445	1.94652	MIKC_MADS
Rhsim11G0144300	2.05691	1.04048	MIKC_MADS
Rhsim08G0008600	3.13992	1.65073	M-type_MADS
Rhsim09G0012400	2.27383	1.18512	M-type_MADS
Rhsim10G0156700	0.168333	-2.57061	M-type_MADS
Rhsim12G0086800	2.19241	1.13252	M-type_MADS
Rhsim01G0235000	2.69699	1.43135	MYB
Rhsim03G0045800	0.449889	-1.15236	MYB
Rhsim03G0090900	Inf	Inf	MYB
Rhsim03G0180500	2.10659	1.07491	MYB
Rhsim04G0061700	5.44138	2.44397	MYB
Rhsim06G0046000	4.43022	2.14738	MYB
Rhsim06G0163100	2.73345	1.45073	MYB
Rhsim08G0136700	3.96198	1.98622	MYB
Rhsim09G0042000	2.43152	1.28186	MYB
Rhsim09G0172100	2.41312	1.2709	MYB
Rhsim10G0056300	4.07436	2.02657	MYB
Rhsim12G0164500	2.50494	1.32478	MYB
Rhsim13G0099300	5.8727	2.55402	MYB
Rhsim03G0160200	2.81461	1.49294	MYB_related
Rhsim05G0073900	2.36475	1.24169	MYB_related
Rhsim06G0032200	2.66551	1.41441	MYB_related
Rhsim07G0002700	3.76775	1.9137	MYB_related
Rhsim07G0019600	0.138451	-2.85255	MYB_related
Rhsim08G0087600	0.325286	-1.62022	MYB_related
Rhsim08G0238400	0.356532	-1.4879	MYB_related
Rhsim11G0177900	0.412871	-1.27624	MYB_related
Rhsim08G0194300	2.51295	1.32938	NAC
Rhsim10G0003400	3.2069	1.68118	NAC
Rhsim10G0036100	2.00576	1.00415	NAC
Rhsim12G0096900	2.18705	1.12899	NAC
Rhsim12G0175300	2.34414	1.22906	NAC
Rhsim13G0113000	3.22677	1.69009	NAC
Rhsim03G0063600	3.89582	1.96193	NF-YA
Rhsim08G0237000	4.02022	2.00728	NF-YA
Rhsim10G0132000	2.68181	1.42321	NF-YB
Rhsim02G0225800	0.0713247	-3.80946	NF-YC
Rhsim05G0210500	8.97288	3.16557	NF-YC
Rhsim03G0008900	4.96048	2.31048	SBP
Rhsim12G0094100	2.33207	1.22161	SBP
RhsimUnG0060100	2.09006	1.06355	STAT
Rhsim11G0044800	2.0468	1.03337	TALE
Rhsim12G0113400	2.16939	1.11729	TALE
Rhsim02G0139200	0.467127	-1.09811	TCP
Rhsim07G0022500	0.404688	-1.30512	TCP
Rhsim10G0063600	2.30979	1.20776	TCP
Rhsim12G0148800	3.00215	1.586	TCP
Rhsim05G0216700	2.2755	1.18619	Trihelix
Rhsim06G0131000	2.79325	1.48194	Trihelix
Rhsim07G0083100	0.44389	-1.17173	WRKY
Rhsim08G0158800	0.447149	-1.16117	WRKY
Rhsim10G0148800	2.72512	1.44632	WRKY
Rhsim12G0094500	0.413744	-1.27319	WRKY
Rhsim13G0004700	2.51142	1.32851	WRKY
Rhsim13G0061600	0.296416	-1.7543	WRKY
Rhsim06G0032400	0	-Inf	ZF-HD

## Sheet: B vs. A
id	foldChange(B/A)	log2FoldChange	Family
Rhsim12G0086600	2.91994	1.54594	ARR-B
Rhsim01G0258000	Inf	Inf	B3
Rhsim07G0229600	4.39699	2.13652	B3
Rhsim11G0166600	2.73117	1.44952	B3
Rhsim11G0166700	6.01075	2.58755	B3
Rhsim11G0170400	20.48	4.35614	B3
RhsimUnG0258800	0.423666	-1.239	B3
Rhsim02G0032900	0.154924	-2.69036	bHLH
Rhsim04G0057500	2.06678	1.04739	bHLH
Rhsim06G0069000	13.7236	3.77858	bHLH
Rhsim06G0190900	0.192874	-2.37427	bHLH
Rhsim07G0015600	2.59715	1.37693	bHLH
Rhsim07G0032300	0.420771	-1.24889	bHLH
Rhsim07G0079500	2.75018	1.45953	bHLH
Rhsim08G0230000	0.0720564	-3.79473	bHLH
Rhsim09G0106500	93.0884	6.54053	bHLH
Rhsim10G0040900	4.80876	2.26567	bHLH
Rhsim12G0163800	3.78398	1.91991	bHLH
Rhsim13G0050900	2.299	1.20101	bHLH
Rhsim04G0234800	0.239153	-2.064	bZIP
Rhsim06G0135000	8.75932	3.13082	bZIP
Rhsim07G0228100	3.33483	1.73761	bZIP
Rhsim09G0118000	Inf	Inf	bZIP
Rhsim10G0154600	0.253597	-1.97939	bZIP
Rhsim11G0165000	2.10711	1.07527	bZIP
Rhsim11G0179700	0.357598	-1.48359	bZIP
Rhsim13G0111100	0.344359	-1.53801	bZIP
RhsimUnG0219100	0.218107	-2.19689	bZIP
Rhsim01G0006300	0.246839	-2.01836	C2H2
Rhsim01G0135400	12.8451	3.68314	C2H2
Rhsim01G0135500	4.1164	2.04138	C2H2
Rhsim07G0049000	7.84085	2.97101	C2H2
Rhsim09G0163800	0.381422	-1.39054	C2H2
Rhsim13G0223500	2.39679	1.26111	C2H2
Rhsim03G0016200	6.1297	2.61582	C3H
Rhsim03G0017700	5.2356	2.38835	C3H
Rhsim03G0235400	2.68348	1.42411	C3H
Rhsim05G0029500	5.35493	2.42087	C3H
Rhsim11G0134600	2.38458	1.25374	C3H
Rhsim13G0068400	0.437941	-1.19119	C3H
Rhsim06G0157800	3.89137	1.96028	CO-like
Rhsim12G0084500	0.273383	-1.871	CO-like
Rhsim08G0223800	40.475	5.33896	CPP
Rhsim06G0041000	0.295368	-1.75941	Dof
Rhsim08G0104800	3.92053	1.97105	Dof
Rhsim08G0231700	2.63991	1.40049	Dof
Rhsim10G0038600	2.66655	1.41498	Dof
RhsimUnG0043700	2.34358	1.22871	Dof
Rhsim05G0191200	0.480839	-1.05638	E2F/DP
Rhsim01G0207300	0.276635	-1.85395	ERF
Rhsim01G0243900	0.362039	-1.46578	ERF
Rhsim02G0036200	0.12637	-2.98428	ERF
Rhsim02G0040100	67.7557	6.08227	ERF
Rhsim02G0040200	2.19776	1.13603	ERF
Rhsim03G0161100	0.289695	-1.78739	ERF
Rhsim03G0176600	2.05707	1.04059	ERF
Rhsim03G0226400	0.0766132	-3.70626	ERF
Rhsim05G0004400	0.270151	-1.88816	ERF
Rhsim05G0084300	0.074935	-3.73822	ERF
Rhsim06G0027500	Inf	Inf	ERF
Rhsim06G0105000	0	-Inf	ERF
Rhsim06G0147200	0.495028	-1.01442	ERF
Rhsim07G0003300	8.58447	3.10173	ERF
Rhsim07G0072500	105.981	6.72766	ERF
Rhsim07G0115900	0.184938	-2.43489	ERF
Rhsim07G0116600	0.131283	-2.92925	ERF
Rhsim07G0116700	0.197091	-2.34306	ERF
Rhsim07G0188600	0.140104	-2.83543	ERF
Rhsim08G0214100	5.72998	2.51853	ERF
Rhsim09G0189800	0.460685	-1.11815	ERF
Rhsim09G0189900	0.238177	-2.0699	ERF
Rhsim09G0203500	0.432665	-1.20868	ERF
Rhsim12G0192100	12.0871	3.59539	ERF
Rhsim13G0034200	0.336548	-1.57112	ERF
Rhsim13G0058400	0.162989	-2.61716	ERF
RhsimUnG0094400	0.276999	-1.85205	ERF
Rhsim02G0114200	0.127416	-2.97238	FAR1
Rhsim04G0161500	0.284223	-1.8149	FAR1
Rhsim05G0110700	98.9738	6.62898	FAR1
Rhsim05G0159900	0.0257157	-5.2812	FAR1
Rhsim06G0231600	2.57355	1.36376	FAR1
Rhsim08G0142800	2.70482	1.43553	FAR1
Rhsim08G0146600	0.226607	-2.14174	FAR1
Rhsim10G0159200	3.01425	1.5918	FAR1
RhsimUnG0161100	0.222571	-2.16766	FAR1
RhsimUnG0212200	0.459358	-1.12231	FAR1
RhsimUnG0247000	2.0586	1.04167	FAR1
Rhsim04G0086400	2.39538	1.26026	G2-like
Rhsim07G0021200	0.0995484	-3.32846	G2-like
Rhsim07G0107600	2.14413	1.10039	G2-like
Rhsim09G0055800	0.401335	-1.31712	G2-like
Rhsim01G0135800	3.92158	1.97144	GATA
Rhsim02G0176800	Inf	Inf	GATA
Rhsim07G0146600	16.0726	4.00653	GATA
Rhsim11G0032500	0	-Inf	GeBP
Rhsim01G0291300	0.360776	-1.47082	GRAS
Rhsim08G0193400	3.60659	1.85064	GRAS
Rhsim10G0178900	6.45806	2.6911	GRAS
Rhsim01G0177300	4.47817	2.16291	HD-ZIP
Rhsim07G0077900	2.34669	1.23063	HD-ZIP
Rhsim08G0124300	Inf	Inf	HD-ZIP
Rhsim09G0208900	0.435871	-1.19803	HD-ZIP
Rhsim01G0272100	2.02733	1.01958	HSF
Rhsim10G0118300	0.388909	-1.36249	HSF
Rhsim08G0234200	2.1636	1.11343	LBD
Rhsim10G0121800	4.74179	2.24543	LBD
Rhsim12G0159700	Inf	Inf	LBD
Rhsim12G0206300	2.29382	1.19775	LBD
Rhsim13G0061300	0.144782	-2.78804	LBD
Rhsim13G0091900	0.143569	-2.80019	LBD
Rhsim06G0119100	4.19819	2.06977	MIKC_MADS
Rhsim07G0211700	3.45493	1.78865	MIKC_MADS
Rhsim12G0176200	3.79872	1.92551	MIKC_MADS
Rhsim08G0008600	5.58398	2.48129	M-type_MADS
Rhsim09G0012400	2.37314	1.2468	M-type_MADS
Rhsim10G0156700	0.045064	-4.47188	M-type_MADS
Rhsim12G0086800	2.40575	1.26649	M-type_MADS
Rhsim01G0264200	0.313538	-1.67329	MYB
Rhsim02G0001800	0.414456	-1.27071	MYB
Rhsim03G0090900	Inf	Inf	MYB
Rhsim03G0180500	3.64871	1.86739	MYB
Rhsim06G0153700	0.13743	-2.86323	MYB
Rhsim06G0163100	2.31939	1.21375	MYB
Rhsim07G0102900	Inf	Inf	MYB
Rhsim08G0087300	2.17825	1.12317	MYB
Rhsim08G0136700	6.57324	2.7166	MYB
Rhsim09G0042000	8.27131	3.04812	MYB
Rhsim09G0106400	0.476418	-1.0697	MYB
Rhsim10G0112500	0.476753	-1.06869	MYB
Rhsim01G0214800	5.63014	2.49317	MYB_related
Rhsim01G0229600	2.0301	1.02155	MYB_related
Rhsim03G0160200	2.62554	1.39262	MYB_related
Rhsim05G0022500	0.162492	-2.62156	MYB_related
Rhsim05G0088000	0.363592	-1.45961	MYB_related
Rhsim07G0002700	7.90563	2.98288	MYB_related
Rhsim07G0019500	0.21423	-2.22277	MYB_related
Rhsim11G0178400	13.1335	3.71518	MYB_related
Rhsim02G0069700	0.441982	-1.17794	NAC
Rhsim05G0111300	3.25969	1.70474	NAC
Rhsim06G0239700	0.427254	-1.22683	NAC
Rhsim08G0040700	0.274297	-1.86619	NAC
Rhsim08G0194300	2.65933	1.41107	NAC
Rhsim10G0003400	3.20307	1.67945	NAC
Rhsim11G0012800	2.01935	1.01389	NAC
Rhsim12G0065300	0.200266	-2.32001	NAC
Rhsim12G0096900	2.12668	1.0886	NAC
Rhsim13G0035900	0.357891	-1.48241	NAC
Rhsim10G0013500	2.45804	1.29751	NF-YB
Rhsim10G0132000	3.65611	1.87031	NF-YB
Rhsim05G0210500	8.30118	3.05332	NF-YC
RhsimUnG0136700	0.355149	-1.4935	RAV
Rhsim04G0070000	3.40968	1.76964	SBP
Rhsim07G0032900	2.22191	1.1518	SBP
Rhsim12G0094100	3.19839	1.67734	SBP
Rhsim12G0149900	3.20683	1.68115	SBP
RhsimUnG0060100	2.38714	1.25528	STAT
Rhsim06G0095300	0.275407	-1.86036	TCP
Rhsim06G0133700	0.276797	-1.8531	TCP
Rhsim07G0022500	0.153902	-2.69991	TCP
Rhsim08G0156400	0.443327	-1.17356	TCP
Rhsim10G0063800	0.499389	-1.00176	TCP
Rhsim11G0125700	0.451984	-1.14566	TCP
Rhsim12G0023400	0.459275	-1.12257	TCP
Rhsim12G0148800	2.79681	1.48378	TCP
Rhsim06G0131000	2.15427	1.1072	Trihelix
Rhsim01G0241100	0.446745	-1.16248	WRKY
Rhsim03G0198800	0.135595	-2.88262	WRKY
Rhsim05G0231400	0.41387	-1.27275	WRKY
Rhsim05G0231500	0.485428	-1.04267	WRKY
Rhsim06G0164400	0.496764	-1.00937	WRKY
Rhsim06G0226600	2.75423	1.46165	WRKY
Rhsim07G0010600	0.477096	-1.06765	WRKY
Rhsim07G0083100	0.219639	-2.18679	WRKY
Rhsim08G0098300	0.388159	-1.36528	WRKY
Rhsim08G0205900	0.451781	-1.1463	WRKY
Rhsim12G0094500	0.377932	-1.4038	WRKY
Rhsim13G0061600	0.209492	-2.25503	WRKY
Rhsim13G0151900	0.480975	-1.05597	WRKY
Rhsim09G0085300	10.4347	3.38332	ZF-HD

## Sheet: 56 TFs
id	log2FoldChange (D/A)	log2FoldChange (C/A)	log2FoldChange (B/A)	Family
Rhsim12G0086600	1.43083	1.4207	1.54594	ARR-B
Rhsim11G0166700	1.52438	1.32486	2.58755	B3
Rhsim08G0230000	-1.15025	-2.27022	-3.79473	bHLH
Rhsim09G0106500	5.17773	5.89544	6.54053	bHLH
Rhsim07G0228100	1.08817	1.31272	1.73761	bZIP
Rhsim09G0118000	Inf	Inf	Inf	bZIP
Rhsim01G0006300	-1.97489	-1.10097	-2.01836	C2H2
Rhsim01G0135500	2.94813	1.69694	2.04138	C2H2
Rhsim07G0049000	3.25577	1.71584	2.97101	C2H2
Rhsim03G0016200	1.95505	1.88728	2.61582	C3H
Rhsim03G0017700	1.61102	1.74472	2.38835	C3H
Rhsim06G0157800	1.22628	1.3579	1.96028	CO-like
Rhsim08G0223800	5.51815	5.69506	5.33896	CPP
Rhsim06G0041000	-1.18655	-1.18713	-1.75941	Dof
Rhsim08G0104800	1.79443	2.49723	1.97105	Dof
RhsimUnG0043700	1.26965	1.15849	1.22871	Dof
Rhsim01G0243900	-1.48949	-1.07392	-1.46578	ERF
Rhsim02G0036200	-1.26238	-1.4694	-2.98428	ERF
Rhsim02G0040100	5.78657	6.10081	6.08227	ERF
Rhsim03G0176600	1.25955	1.31548	1.04059	ERF
Rhsim03G0226400	-2.48955	-2.84162	-3.70626	ERF
Rhsim07G0072500	5.34801	5.61894	6.72766	ERF
Rhsim08G0214100	2.93357	2.06216	2.51853	ERF
Rhsim12G0192100	1.20797	3.55893	3.59539	ERF
RhsimUnG0094400	-1.0179	-1.21897	-1.85205	ERF
Rhsim02G0114200	-2.31045	-1.52471	-2.97238	FAR1
Rhsim05G0159900	-5.89096	-5.7143	-5.2812	FAR1
Rhsim08G0146600	-2.5333	-1.76839	-2.14174	FAR1
Rhsim07G0021200	-4.09404	-3.5307	-3.32846	G2-like
Rhsim02G0176800	Inf	Inf	Inf	GATA
Rhsim10G0178900	1.49696	2.16681	2.6911	GRAS
Rhsim08G0234200	2.34959	1.37229	1.11343	LBD
Rhsim10G0121800	2.79521	1.91021	2.24543	LBD
Rhsim12G0206300	2.48344	1.53855	1.19775	LBD
Rhsim13G0091900	-1.22408	-1.40106	-2.80019	LBD
Rhsim07G0211700	1.48355	1.94652	1.78865	MIKC_MADS
Rhsim08G0008600	3.11889	1.65073	2.48129	M-type_MADS
Rhsim09G0012400	2.32162	1.18512	1.2468	M-type_MADS
Rhsim10G0156700	-3.45988	-2.57061	-4.47188	M-type_MADS
Rhsim12G0086800	1.40876	1.13252	1.26649	M-type_MADS
Rhsim03G0180500	2.34262	1.07491	1.86739	MYB
Rhsim06G0163100	2.70499	1.45073	1.21375	MYB
Rhsim09G0042000	1.37431	1.28186	3.04812	MYB
Rhsim03G0160200	2.6527	1.49294	1.39262	MYB_related
Rhsim07G0002700	1.33631	1.9137	2.98288	MYB_related
Rhsim08G0194300	1.65452	1.32938	1.41107	NAC
Rhsim10G0003400	1.47058	1.68118	1.67945	NAC
Rhsim10G0132000	2.94063	1.42321	1.87031	NF-YB
Rhsim05G0210500	2.99779	3.16557	3.05332	NF-YC
Rhsim12G0094100	1.25082	1.22161	1.67734	SBP
RhsimUnG0060100	1.02877	1.06355	1.25528	STAT
Rhsim07G0022500	-1.43924	-1.30512	-2.69991	TCP
Rhsim12G0148800	1.80502	1.586	1.48378	TCP
Rhsim06G0131000	1.04595	1.48194	1.1072	Trihelix
Rhsim07G0083100	-1.27824	-1.17173	-2.18679	WRKY
Rhsim13G0061600	-2.72232	-1.7543	-2.25503	WRKY
