# Supplementary material for: Transcriptomic Analysis Reveals the Regulatory Mechanism of Color Diversity in Rhododendron pulchrum Sweet (Ericaceae)
Source: Plants (Basel). 2023 Jul 15;12(14):2656. doi: 10.3390/plants12142656 (PMC10384940; doi:10.3390/plants12142656)
Supplement: Supplementary file 1 [file plants-12-02656-s001.zip › Table S6.xlsx]

## Sheet: D vs. A
Table S6: List of phytohormone signal transduction and biosynthesis related DEGs
id	log2FoldChange (D/A)	Description
Rhsim11G0132800	1.17516	ABF;ABA responsive element binding factor
Rhsim07G0228100	1.08817	ABF;ABA responsive element binding factor
Rhsim08G0227400	1.67469	AHP;histidine-containing phosphotransfer peotein
Rhsim04G0110800	1.12212	ARR-A;two-component response regulator ARR-A family
Rhsim07G0021200	-4.09404	ARR-B;two-component response regulator ARR-B family
RhsimUnG0200100	6.15558	BAK1;brassinosteroid insensitive 1-associated receptor kinase 1
Rhsim10G0009200	1.47344	BAK1;brassinosteroid insensitive 1-associated receptor kinase 1
Rhsim10G0151700	2.45695	BAK1;brassinosteroid insensitive 1-associated receptor kinase 1
Rhsim12G0021500	4.1968	BAK1;brassinosteroid insensitive 1-associated receptor kinase 1
Rhsim02G0071400	1.43661	BAK1;brassinosteroid insensitive 1-associated receptor kinase 1
Rhsim12G0017900	2.29008	BAK1;brassinosteroid insensitive 1-associated receptor kinase 1
Rhsim05G0110100	-3.31273	BAK1;brassinosteroid insensitive 1-associated receptor kinase 1
Rhsim10G0027000	-4.76722	BAK1;brassinosteroid insensitive 1-associated receptor kinase 1
Rhsim09G0181000	-1.92701	BRI1;protein brassinosteroid insensitive 1
Rhsim07G0028200	-1.10508	BRI1;protein brassinosteroid insensitive 1
Rhsim13G0075500	-1.49841	BSK;BR-signaling kinase
Rhsim06G0055100	1.19254	CYCD3;cyclin D3, plant
RhsimUnG0126900	1.94448	GH3;auxin responsive GH3 gene family
Rhsim11G0155700	1.87765	GH3;auxin responsive GH3 gene family
RhsimUnG0255100	2.83079	GH3;auxin responsive GH3 gene family
Rhsim08G0097200	3.61844	GH3;auxin responsive GH3 gene family
Rhsim06G0190800	1.02798	GH3;auxin responsive GH3 gene family
Rhsim13G0033000	-2.1625	GH3;auxin responsive GH3 gene family
Rhsim01G0269800	1.24951	IAA;auxin-responsive protein IAA
Rhsim01G0269900	2.52274	IAA;auxin-responsive protein IAA
Rhsim02G0032800	1.05689	IAA;auxin-responsive protein IAA
Rhsim03G0250500	2.96517	IAA;auxin-responsive protein IAA
Rhsim12G0203100	1.30312	IAA;auxin-responsive protein IAA
Rhsim06G0023400	-1.48008	K14486, ARF;auxin response factor
Rhsim05G0017400	Inf	NPR1;regulatory protein NPR1
Rhsim05G0018000	-1.29162	NPR1;regulatory protein NPR1
Rhsim05G0018100	-1.07011	NPR1;regulatory protein NPR1
Rhsim01G0258300	-1.54865	PIF3;phytochrome-interacting factor 3
Rhsim05G0184500	2.66757	PR1;pathogenesis-related protein 1
Rhsim01G0008200	Inf	PR1;pathogenesis-related protein 1
Rhsim11G0148300	-1.21697	PR1;pathogenesis-related protein 1
Rhsim11G0148600	-1.16895	PR1;pathogenesis-related protein 1
Rhsim05G0002700	2.45906	SAUR;SAUR family protein
Rhsim06G0023000	1.41715	SAUR;SAUR family protein
Rhsim05G0066800	1.85842	SAUR;SAUR family protein
Rhsim05G0064400	1.2816	SAUR;SAUR family protein
Rhsim05G0066100	2.07166	SAUR;SAUR family protein
Rhsim05G0065600	2.15128	SAUR;SAUR family protein
Rhsim05G0065700	2.03156	SAUR;SAUR family protein
Rhsim05G0064700	1.62368	SAUR;SAUR family protein
Rhsim05G0065800	2.10632	SAUR;SAUR family protein
Rhsim05G0064900	1.82102	SAUR;SAUR family protein
Rhsim05G0065900	1.6654	SAUR;SAUR family protein
Rhsim05G0066700	1.59115	SAUR;SAUR family protein
Rhsim05G0064600	2.30236	SAUR;SAUR family protein
Rhsim05G0065100	2.31692	SAUR;SAUR family protein
Rhsim05G0066500	1.45147	SAUR;SAUR family protein
Rhsim05G0066400	2.66903	SAUR;SAUR family protein
Rhsim05G0066000	1.63473	SAUR;SAUR family protein
Rhsim05G0065500	1.80338	SAUR;SAUR family protein
Rhsim04G0005000	-2.37822	SAUR;SAUR family protein
Rhsim01G0149700	-1.43754	SAUR;SAUR family protein
Rhsim10G0154600	-2.53928	TGA;transcription factor TGA
RhsimUnG0219100	-1.78878	TGA;transcription factor TGA

## Sheet: C vs. A
id	log2FoldChange (C/A)	Description
Rhsim07G0228100	1.31272	ABF;ABA responsive element binding factor
Rhsim03G0040500	-1.2825	ARR-A;two-component response regulator ARR-A family
Rhsim07G0021200	-3.5307	ARR-B;two-component response regulator ARR-B family
RhsimUnG0200100	4.49704	BAK1;brassinosteroid insensitive 1-associated receptor kinase 1
Rhsim10G0009200	1.16871	BAK1;brassinosteroid insensitive 1-associated receptor kinase 1
Rhsim12G0017900	3.09525	BAK1;brassinosteroid insensitive 1-associated receptor kinase 1
Rhsim12G0021500	4.07246	BAK1;brassinosteroid insensitive 1-associated receptor kinase 1
Rhsim02G0071400	1.29903	BAK1;brassinosteroid insensitive 1-associated receptor kinase 1
Rhsim10G0151700	1.31621	BAK1;brassinosteroid insensitive 1-associated receptor kinase 1
Rhsim05G0110100	-2.52512	BAK1;brassinosteroid insensitive 1-associated receptor kinase 1
Rhsim07G0028200	-1.36858	BRI1;protein brassinosteroid insensitive 1
Rhsim09G0181000	-2.70772	BRI1;protein brassinosteroid insensitive 1
Rhsim13G0188900	-1.38981	BRI1;protein brassinosteroid insensitive 1
Rhsim13G0075500	-1.73474	BSK;BR-signaling kinase
Rhsim07G0212700	1.18246	CTR1;serine/threonine-protein kinase CTR1
Rhsim01G0068800	1.40126	EBF1_2;EIN3-binding F-box protein
RhsimUnG0255100	4.1829	GH3;auxin responsive GH3 gene family
Rhsim06G0190800	1.63623	GH3;auxin responsive GH3 gene family
Rhsim13G0033000	-2.61056	GH3;auxin responsive GH3 gene family
Rhsim12G0203100	2.08053	IAA;auxin-responsive protein IAA
Rhsim12G0019500	1.35167	JAZ;jasmonate ZIM domain-containing protein
Rhsim02G0247900	1.98033	K14486, ARF;auxin response factor
Rhsim02G0248200	1.09126	K14486, ARF;auxin response factor
Rhsim09G0174900	Inf	MKK4_5;mitogen-activated protein kinase kinase 4/5
Rhsim03G0034400	1.64554	NPR1;regulatory protein NPR1
Rhsim05G0017400	Inf	NPR1;regulatory protein NPR1
Rhsim05G0018000	-1.10078	NPR1;regulatory protein NPR1
Rhsim05G0018100	-1.34975	NPR1;regulatory protein NPR1
Rhsim06G0052600	-1.55437	PIF3;phytochrome-interacting factor 3
Rhsim05G0184500	1.43612	PR1;pathogenesis-related protein 1
Rhsim11G0148300	-1.90605	PR1;pathogenesis-related protein 1
Rhsim11G0148600	-3.29515	PR1;pathogenesis-related protein 1
Rhsim07G0126600	-3.09841	PYL;abscisic acid receptor PYR/PYL family
Rhsim05G0002700	1.25875	SAUR;SAUR family protein
Rhsim05G0065100	1.28322	SAUR;SAUR family protein
Rhsim04G0005000	-1.5642	SAUR;SAUR family protein
Rhsim05G0066700	-1.01271	SAUR;SAUR family protein
Rhsim07G0199000	1.25254	TGA;transcription factor TGA

## Sheet: B vs. A
id	log2FoldChange (B/A)	Description
Rhsim11G0165000	1.07527	ABF;ABA responsive element binding factor
Rhsim07G0228100	1.73761	ABF;ABA responsive element binding factor
Rhsim08G0227400	1.69569	AHP;histidine-containing phosphotransfer peotein
Rhsim04G0110800	1.54682	ARR-A;two-component response regulator ARR-A family
Rhsim07G0021200	-3.32846	ARR-B;two-component response regulator ARR-B family
Rhsim02G0071400	2.31128	BAK1;brassinosteroid insensitive 1-associated receptor kinase 1
Rhsim10G0151700	2.1871	BAK1;brassinosteroid insensitive 1-associated receptor kinase 1
RhsimUnG0200100	3.83214	BAK1;brassinosteroid insensitive 1-associated receptor kinase 1
Rhsim12G0021500	4.49872	BAK1;brassinosteroid insensitive 1-associated receptor kinase 1
Rhsim12G0017900	3.21192	BAK1;brassinosteroid insensitive 1-associated receptor kinase 1
Rhsim05G0110100	-5.20711	BAK1;brassinosteroid insensitive 1-associated receptor kinase 1
Rhsim10G0027000	-3.87639	BAK1;brassinosteroid insensitive 1-associated receptor kinase 1
Rhsim07G0028200	-1.59498	BRI1;protein brassinosteroid insensitive 1
Rhsim09G0181000	-3.50715	BRI1;protein brassinosteroid insensitive 1
Rhsim13G0188900	-2.04279	BRI1;protein brassinosteroid insensitive 1
Rhsim13G0075500	-1.44831	BSK;BR-signaling kinase
Rhsim07G0212700	1.20252	CTR1;serine/threonine-protein kinase CTR1
Rhsim06G0055100	1.0931	CYCD3;cyclin D3, plant
Rhsim07G0225400	-3.42017	CYCD3;cyclin D3, plant
Rhsim13G0008200	-1.01316	ETR, ERS;ethylene receptor
RhsimUnG0255100	3.5151	GH3;auxin responsive GH3 gene family
Rhsim06G0190800	1.17232	GH3;auxin responsive GH3 gene family
Rhsim13G0033000	-1.08486	GH3;auxin responsive GH3 gene family
Rhsim01G0269900	1.18738	IAA;auxin-responsive protein IAA
Rhsim12G0019500	-1.04189	JAZ;jasmonate ZIM domain-containing protein
Rhsim11G0126700	-2.07796	MKK4_5;mitogen-activated protein kinase kinase 4/5
Rhsim03G0034400	1.11141	NPR1;regulatory protein NPR1
Rhsim05G0017400	Inf	NPR1;regulatory protein NPR1
Rhsim01G0232400	1.71499	PP2C;protein phosphatase 2C
Rhsim05G0184500	1.22606	PR1;pathogenesis-related protein 1
Rhsim01G0008200	Inf	PR1;pathogenesis-related protein 1
Rhsim11G0148300	-1.26851	PR1;pathogenesis-related protein 1
Rhsim11G0148600	-1.34562	PR1;pathogenesis-related protein 1
Rhsim09G0180300	-2.79034	PYL;abscisic acid receptor PYR/PYL family
Rhsim09G0204400	-1.12645	PYL;abscisic acid receptor PYR/PYL family
Rhsim07G0126600	-2.98788	PYL;abscisic acid receptor PYR/PYL family
Rhsim05G0002700	1.04463	SAUR;SAUR family protein
Rhsim05G0065700	1.8113	SAUR;SAUR family protein
Rhsim05G0065900	1.3733	SAUR;SAUR family protein
Rhsim06G0023000	1.00737	SAUR;SAUR family protein
Rhsim05G0064700	1.19882	SAUR;SAUR family protein
Rhsim05G0065100	2.03062	SAUR;SAUR family protein
Rhsim05G0065800	1.35518	SAUR;SAUR family protein
Rhsim05G0065500	1.77485	SAUR;SAUR family protein
Rhsim05G0064900	1.10001	SAUR;SAUR family protein
Rhsim05G0065600	1.29524	SAUR;SAUR family protein
Rhsim05G0064600	1.4147	SAUR;SAUR family protein
Rhsim04G0005000	-1.15506	SAUR;SAUR family protein
Rhsim01G0149700	-1.30236	SAUR;SAUR family protein
Rhsim10G0154600	-1.97939	TGA;transcription factor TGA
RhsimUnG0219100	-2.19689	TGA;transcription factor TGA
Rhsim13G0111100	-1.53801	TGA;transcription factor TGA

## Sheet: common
id	log2FoldChange			Description
	D vs. A	C vs.A	B vs.A
Rhsim09G0181000	-1.92701	-2.70772	-3.50715	BRI1;protein brassinosteroid insensitive 1
Rhsim07G0028200	-1.10508	-1.36858	-1.59498	BRI1;protein brassinosteroid insensitive 1
RhsimUnG0200100	6.15558	4.49704	3.83214	BAK1;brassinosteroid insensitive 1-associated receptor kinase 1
Rhsim10G0151700	2.45695	1.31621	2.1871	BAK1;brassinosteroid insensitive 1-associated receptor kinase 1
Rhsim12G0021500	4.1968	4.07246	4.49872	BAK1;brassinosteroid insensitive 1-associated receptor kinase 1
Rhsim02G0071400	1.43661	1.29903	2.31128	BAK1;brassinosteroid insensitive 1-associated receptor kinase 1
Rhsim12G0017900	2.29008	3.09525	3.21192	BAK1;brassinosteroid insensitive 1-associated receptor kinase 1
Rhsim05G0110100	-3.31273	-2.52512	-5.20711	BAK1;brassinosteroid insensitive 1-associated receptor kinase 1
Rhsim05G0184500	2.66757	1.43612	1.22606	PR1;pathogenesis-related protein 1
Rhsim11G0148300	-1.21697	-1.90605	-1.26851	PR1;pathogenesis-related protein 1
Rhsim11G0148600	-1.16895	-3.29515	-1.34562	PR1;pathogenesis-related protein 1
Rhsim07G0228100	1.08817	1.31272	1.73761	ABF;ABA responsive element binding factor
RhsimUnG0255100	2.83079	4.1829	3.5151	GH3;auxin responsive GH3 gene family
Rhsim06G0190800	1.02798	1.63623	1.17232	GH3;auxin responsive GH3 gene family
Rhsim13G0033000	-2.1625	-2.61056	-1.08486	GH3;auxin responsive GH3 gene family
Rhsim05G0002700	2.45906	1.25875	1.04463	SAUR;SAUR family protein
Rhsim05G0065100	2.31692	1.28322	2.03062	SAUR;SAUR family protein
Rhsim04G0005000	-2.37822	-1.5642	-1.15506	SAUR;SAUR family protein
Rhsim07G0021200	-4.09404	-3.5307	-3.32846	ARR-B;two-component response regulator ARR-B family
Rhsim13G0075500	-1.49841	-1.73474	-1.44831	BSK;BR-signaling kinase
Rhsim05G0017400	Inf	Inf	Inf	NPR1;regulatory protein NPR1
